# Supplementary material for: Isolation of monomeric copper(ii) phenolate selenoether complexes using chelating ortho-bisphenylselenide-phenolate ligands and their electrocatalytic hydrogen gas evolution activity
Source: Royal Society of Chemistry journal article supplement (doi:10.1039/d2dt00678b), 2022-01-01
Supplement: d2dt00678b1.pdf [file d2dt00678b1.pdf]

Supporting information for

**Isolation of Monomeric Copper(II) Phenolate Selenoether Complexes  
using Chelating *ortho*-Bisphenylselenide-phenolate Ligands and Their  
Hydrogen Gas Evolution Electrocatalytic Activity**

Aditya Upadhyay, Harshita Meena, Raushan Kumar Jha, Kanika and Sangit Kumar\*

*Department of Chemistry, Indian Institute of Science Education and Research (IISER) Bhopal,  
Bhopal By-pass Road, Bhuri, Bhopal, Madhya Pradesh, 462066, India. E-mail:  
sangitkumar@iiserb.ac.in; Web: <https://home.iiserb.ac.in/~sangitkumar/>*

## Table of Contents

### Supplementary Test

|                                                                                           |         |
|-------------------------------------------------------------------------------------------|---------|
| Mass data of <b>2a-2d</b>                                                                 | S3-S6   |
| <sup>1</sup> H NMR of ligand <b>1c</b> and acetic acid                                    | S7      |
| <sup>77</sup> Se NMR of ligand <b>1c</b> and acetic acid                                  | S8      |
| UV-visible spectra of <b>2a-2d</b>                                                        | S9-S10  |
| EPR spectra of <b>2a-2d</b>                                                               | S11-S12 |
| SHAPE analysis of <b>2a-2d</b>                                                            | S13     |
| CV graph of complexes <b>2a-2d</b>                                                        | S14-S15 |
| CV of <b>2a-2d</b> at various scan rate                                                   | S16-S17 |
| <i>i<sub>cat</sub></i> vs scan rate study of <b>2a-2d</b> at acid saturated concentration | S18-S19 |
| GC-TCD read outs                                                                          | S20     |
| UV-visible spectra of <b>2a-2d</b> during electrocatalysis                                | S21     |
| UV-visible spectra of <b>2a-2d</b> before and after electrocatalysis                      | S22     |
| FTIR spectra of <b>2a-2d</b> after electrocatalysis                                       | S23     |
| CV of catalysts before and after CPE                                                      | S24     |
| Post electrolysis dip test of <b>2a-2d</b>                                                | S25-S27 |
| Spectroelectrochemical study of <b>2c</b>                                                 | S28     |
| KIE study of <b>2c</b>                                                                    | S29     |
| DFT analysis                                                                              | S30-S47 |
| Electrochemical Studies                                                                   | S48-S49 |
| References                                                                                | S50     |

MS data of 2a

Display Report

Analysis Info

|               |                                                                     |                  |                       |
|---------------|---------------------------------------------------------------------|------------------|-----------------------|
| Analysis Name | D:\Data\new user data 2021\Dec-2021\21 dec\Prof.S.Kumar-AUY-HM-26.d | Acquisition Date | 12/21/2021 3:04:58 PM |
| Method        | tune_wide.m                                                         | Operator         | RUCHI                 |
| Sample Name   | AUY-HM-26                                                           | Instrument       | micrOTOF-Q II 10330   |
| Comment       |                                                                     |                  |                       |

Acquisition Parameter

|             |            |                       |           |                  |           |
|-------------|------------|-----------------------|-----------|------------------|-----------|
| Source Type | ESI        | Ion Polarity          | Positive  | Set Nebulizer    | 0.4 Bar   |
| Focus       | Not active | Set Capillary         | 4500 V    | Set Dry Heater   | 180 °C    |
| Scan Begin  | 50 m/z     | Set End Plate Offset  | -500 V    | Set Dry Gas      | 4.0 l/min |
| Scan End    | 3000 m/z   | Set Collision Cell RF | 600.0 Vpp | Set Divert Valve | Waste     |

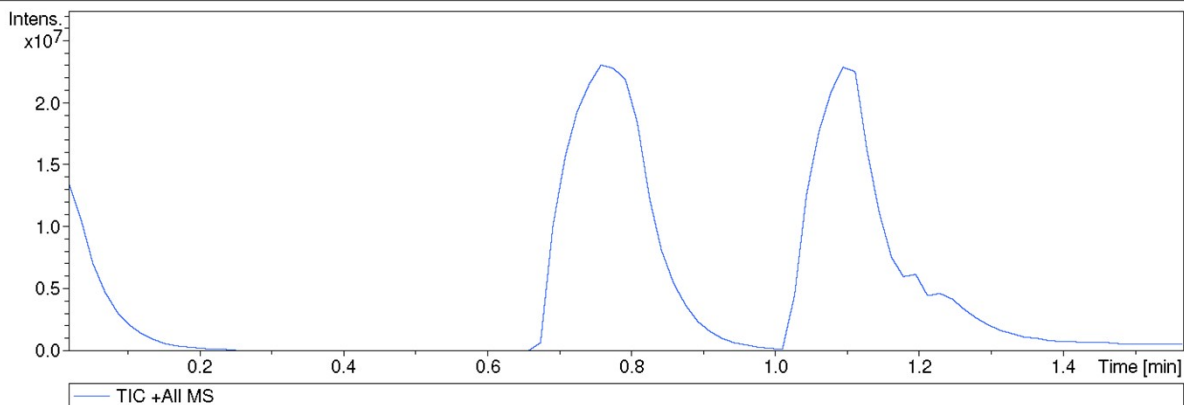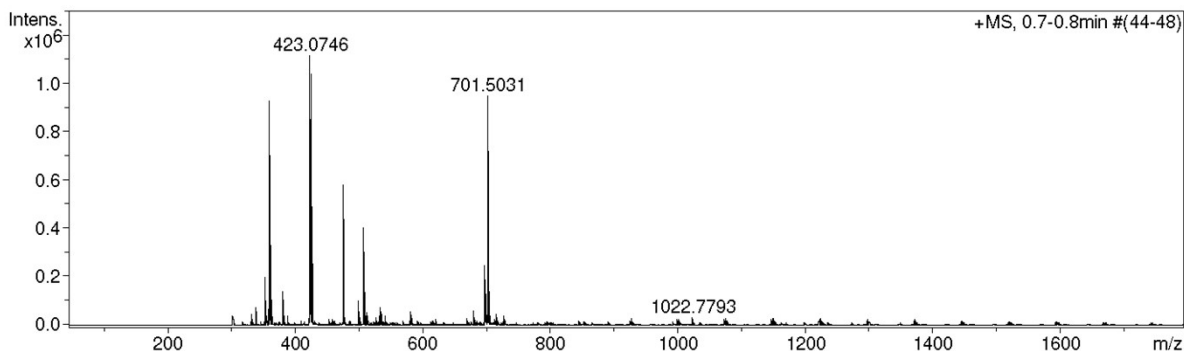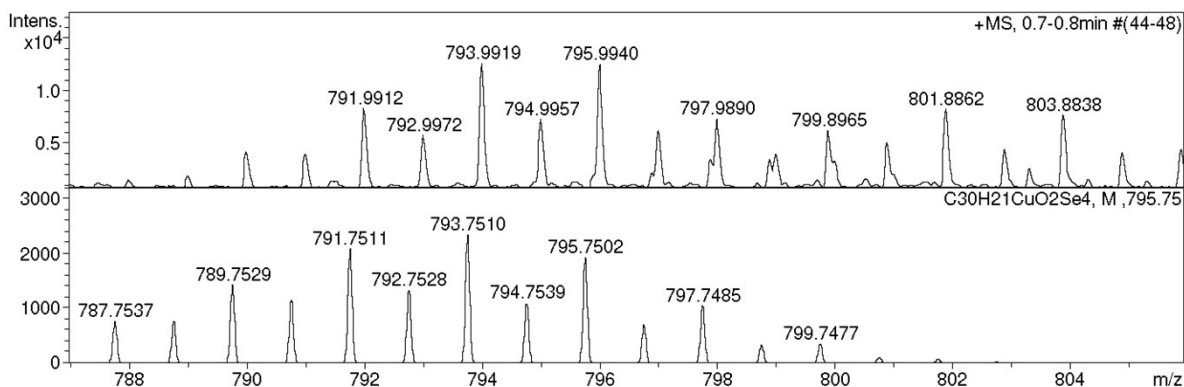

MS data of 2b

Display Report

Analysis Info

|               |                                                              |                  |                      |
|---------------|--------------------------------------------------------------|------------------|----------------------|
| Analysis Name | D:\Data\NEW USER DATA 2020\DEC-2020\08-dec\Dr.S.Kumar-HM21.d | Acquisition Date | 12/8/2020 3:05:22 PM |
| Method        | tune mix_low.New.021117.m                                    | Operator         | RUCHI                |
| Sample Name   | HM21                                                         | Instrument       | micrOTOF-Q II 10330  |
| Comment       |                                                              |                  |                      |

Acquisition Parameter

|             |            |                       |           |                  |           |
|-------------|------------|-----------------------|-----------|------------------|-----------|
| Source Type | ESI        | Ion Polarity          | Positive  | Set Nebulizer    | 0.4 Bar   |
| Focus       | Not active | Set Capillary         | 4600 V    | Set Dry Heater   | 180 °C    |
| Scan Begin  | 50 m/z     | Set End Plate Offset  | -500 V    | Set Dry Gas      | 4.0 l/min |
| Scan End    | 3000 m/z   | Set Collision Cell RF | 100.0 Vpp | Set Divert Valve | Waste     |

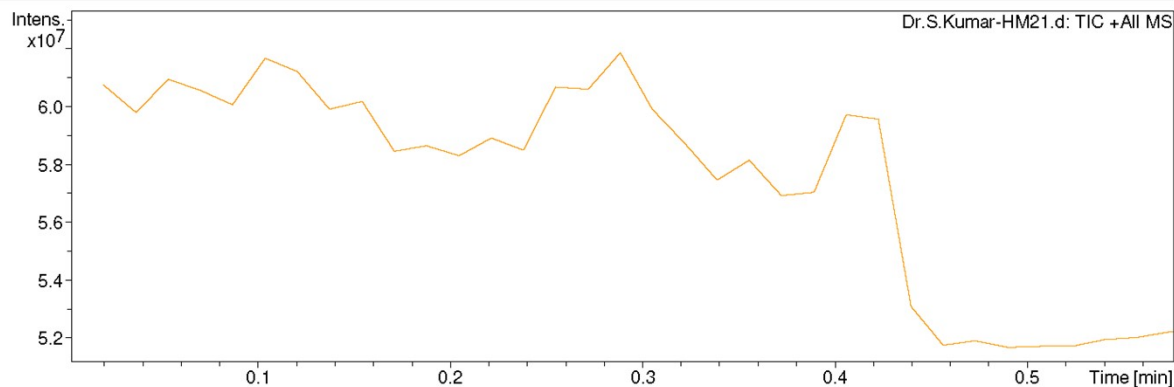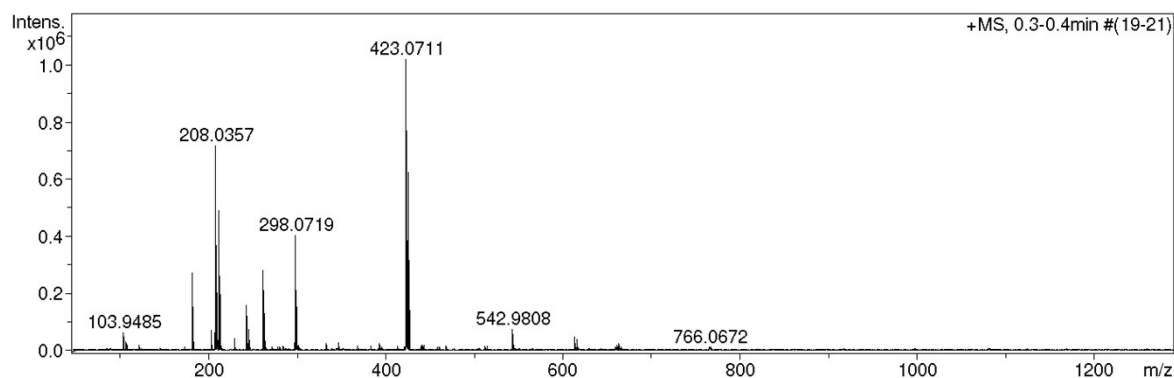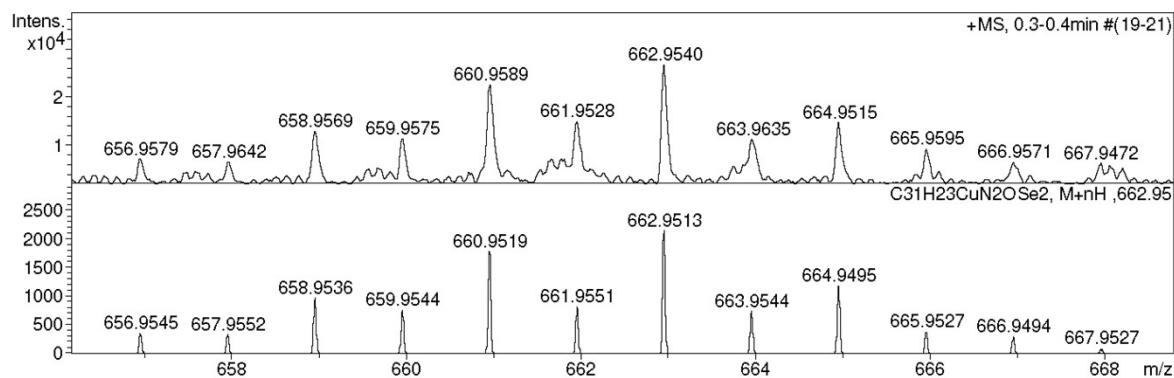

MS data of 2c

Display Report

|                      |                                                                   |                  |                        |
|----------------------|-------------------------------------------------------------------|------------------|------------------------|
| <b>Analysis Info</b> |                                                                   | Acquisition Date | 11/24/2020 12:52:45 PM |
| Analysis Name        | D:\Data\NEW USER DATA 2020\NOV-2020\24-NOV\Prof.S.Kumar-AUY-328.d | Operator         | RUCHI                  |
| Method               | tune_wide.m                                                       | Instrument       | micrOTOF-Q II 10330    |
| Sample Name          | AUY-328                                                           |                  |                        |
| Comment              |                                                                   |                  |                        |

|                              |            |                       |           |                  |           |
|------------------------------|------------|-----------------------|-----------|------------------|-----------|
| <b>Acquisition Parameter</b> |            |                       |           |                  |           |
| Source Type                  | ESI        | Ion Polarity          | Positive  | Set Nebulizer    | 0.4 Bar   |
| Focus                        | Not active | Set Capillary         | 4500 V    | Set Dry Heater   | 180 °C    |
| Scan Begin                   | 50 m/z     | Set End Plate Offset  | -500 V    | Set Dry Gas      | 4.0 l/min |
| Scan End                     | 3000 m/z   | Set Collision Cell RF | 600.0 Vpp | Set Divert Valve | Waste     |

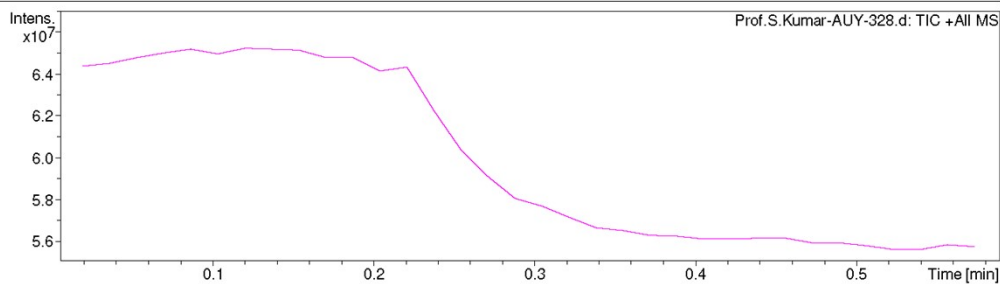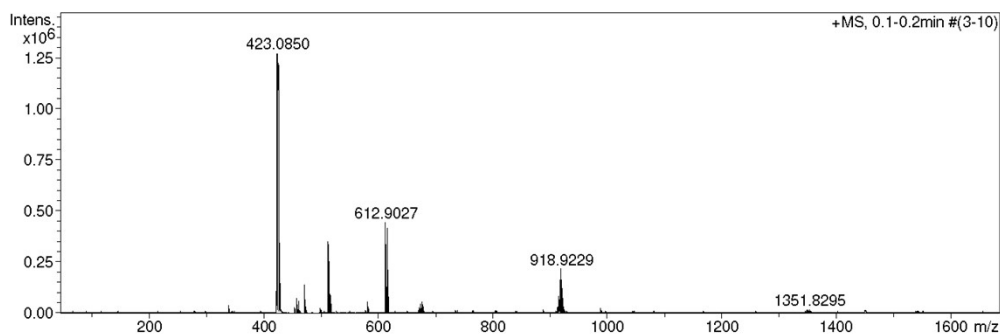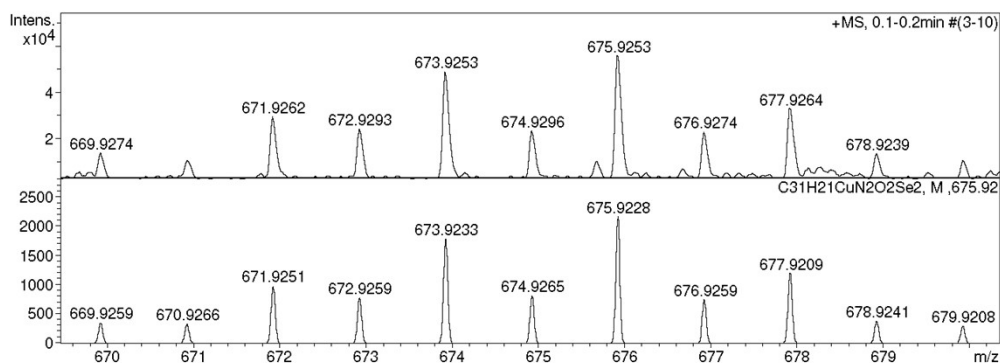

# Mass Data of 2d

## Display Report

|                      |                                                                  |                  |                     |
|----------------------|------------------------------------------------------------------|------------------|---------------------|
| <b>Analysis Info</b> |                                                                  | Acquisition Date | 7/1/2021 4:08:45 PM |
| Analysis Name        | D:\Data\new user data 2021\july-2021\01-July\Dr.S.Kumar-AUY-2D.d | Operator         | RUCHI               |
| Method               | tune_wide_APCI_23.06.m                                           | Instrument       | micrOTOF-Q II 10330 |
| Sample Name          | AUY-2D                                                           |                  |                     |
| Comment              |                                                                  |                  |                     |

### Acquisition Parameter

|             |            |                       |           |                  |           |
|-------------|------------|-----------------------|-----------|------------------|-----------|
| Source Type | Multi Mode | Ion Polarity          | Positive  | Set Nebulizer    | 2.0 Bar   |
| Focus       | Not active | Set Capillary         | 2500 V    | Set Dry Heater   | 200 °C    |
| Scan Begin  | 50 m/z     | Set End Plate Offset  | -500 V    | Set Dry Gas      | 5.0 l/min |
| Scan End    | 3000 m/z   | Set Collision Cell RF | 600.0 Vpp | Set Divert Valve | Waste     |

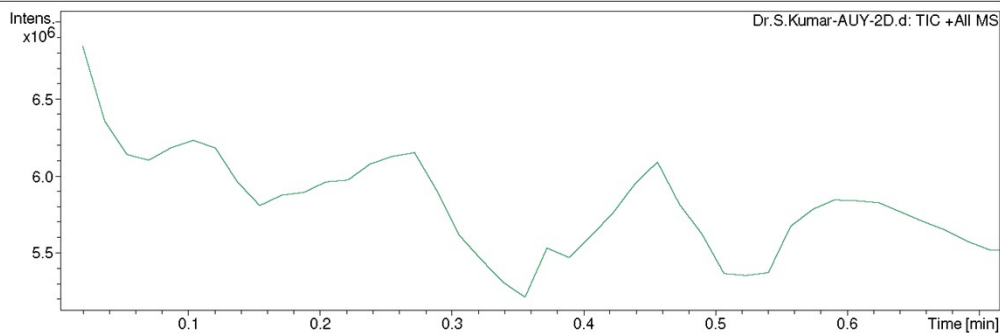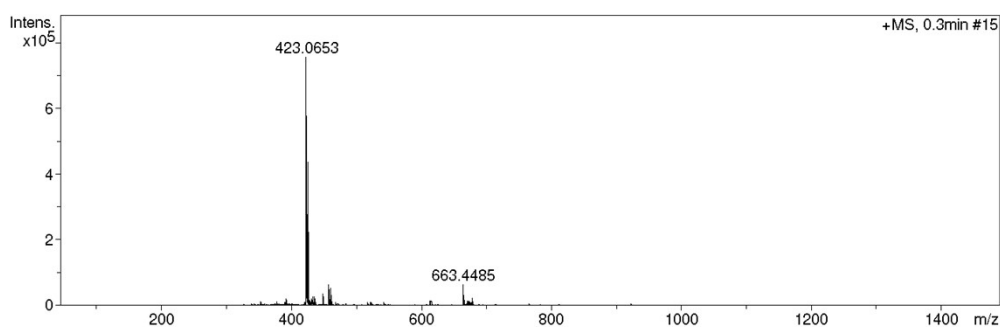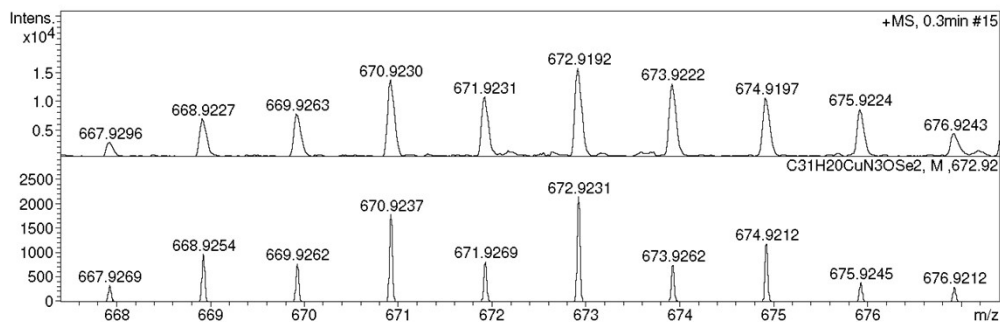

<sup>1</sup>H NMR of a reaction mixture of ligand **1c** and acetic acid

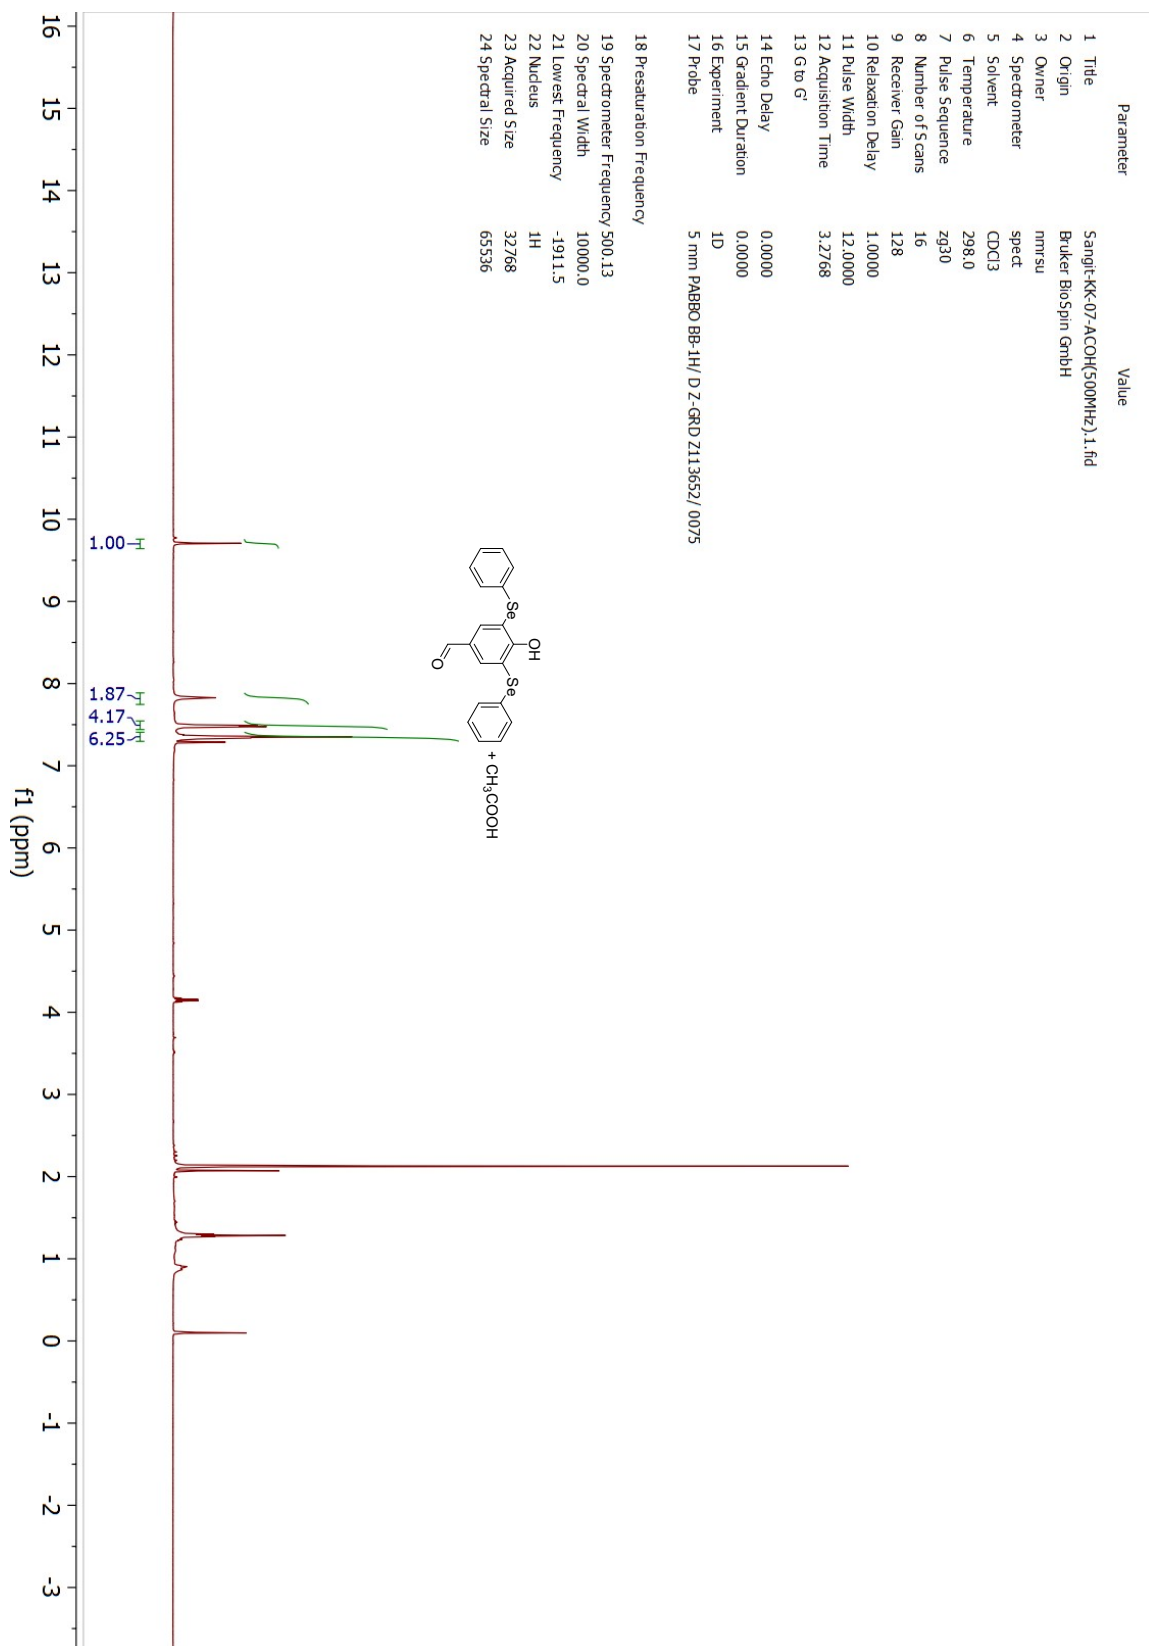

<sup>77</sup>Se NMR of a reaction mixture of ligand **1c** and acetic acid

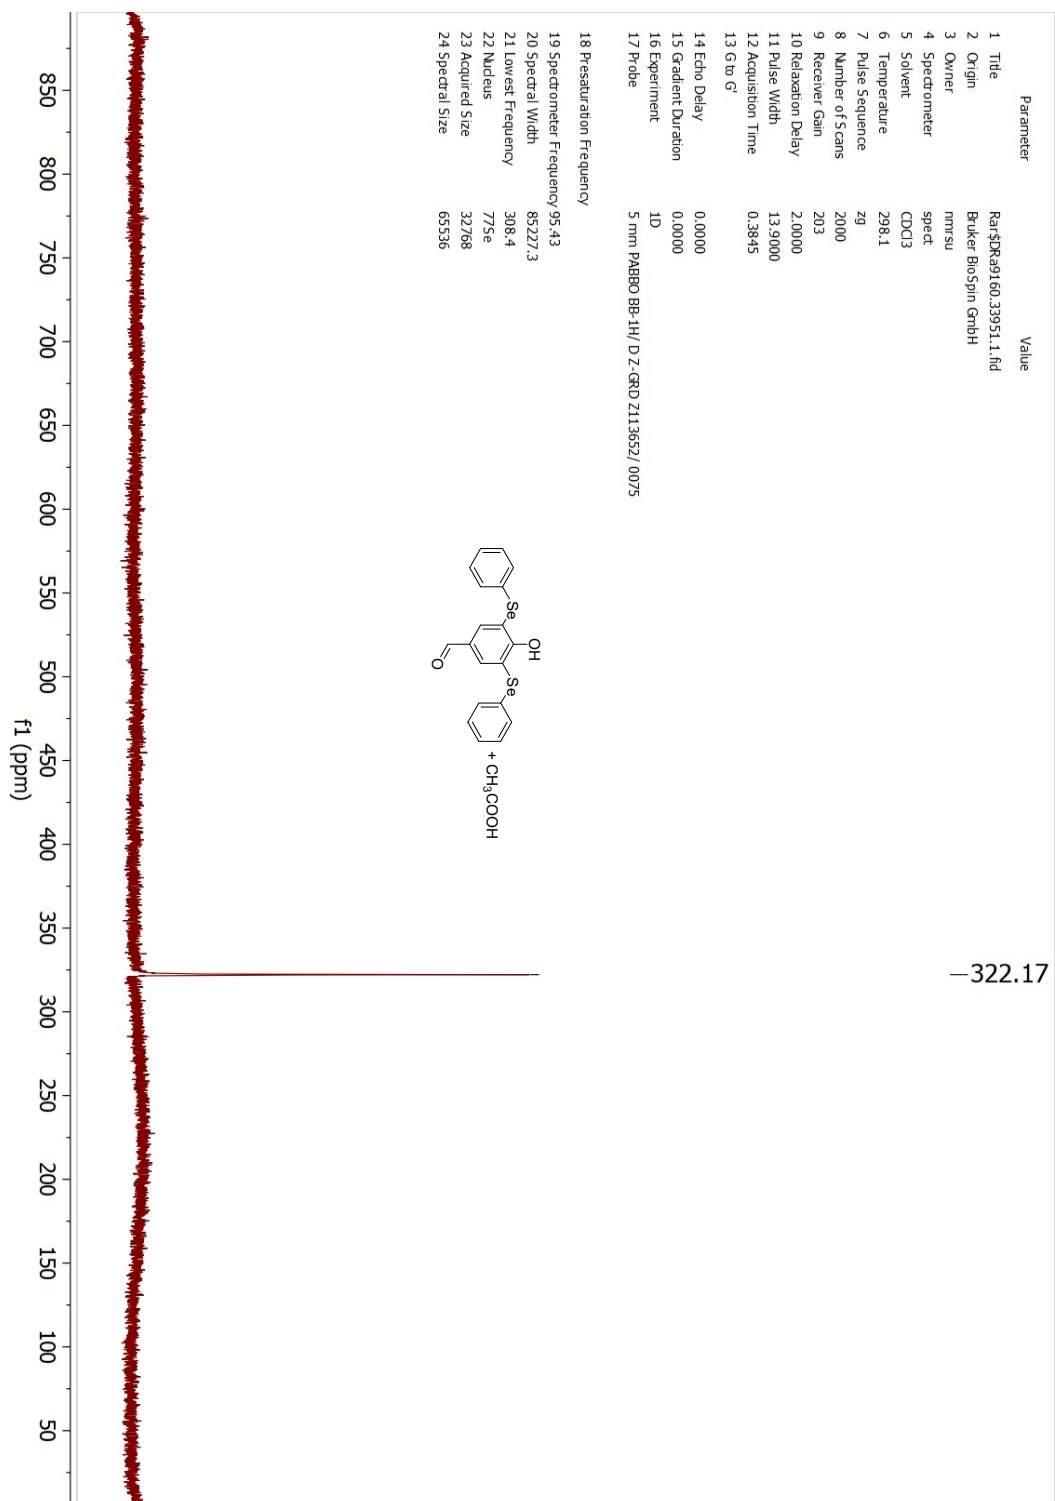



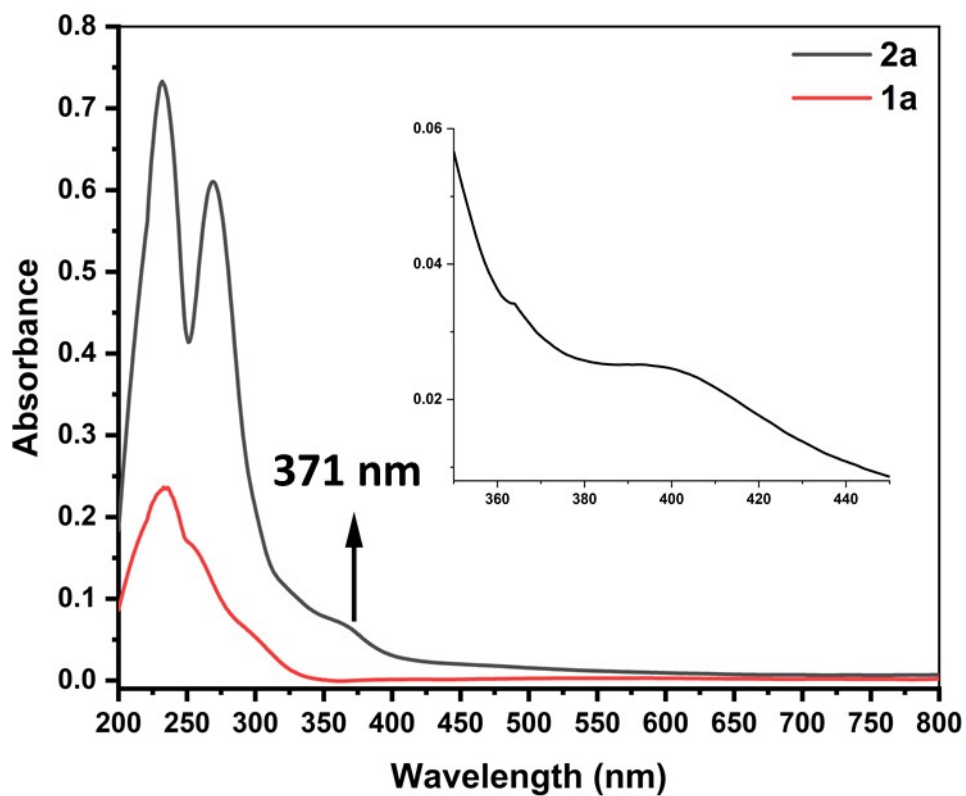

**Figure S1.** UV-Visible spectra of **2a** and **1a** in  $\text{CH}_2\text{Cl}_2$  solvent. A zoomed image of LMCT band has been given in the inset of the image.

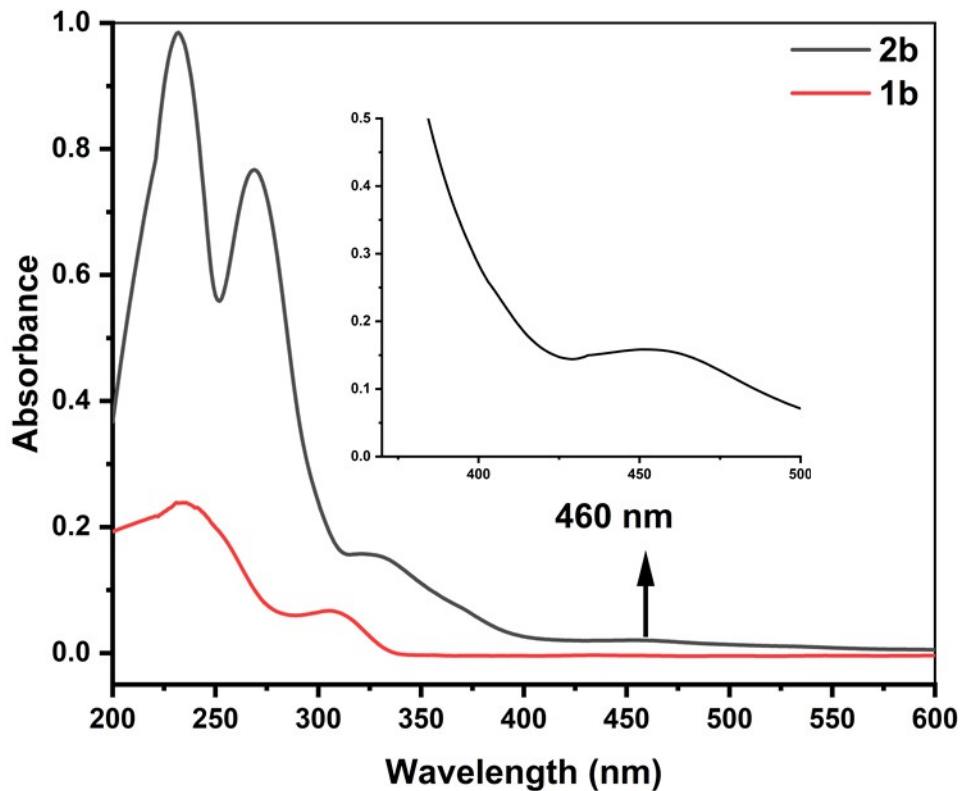

**Figure S2.** UV-Visible spectra of **2b** and **1b** in  $\text{CH}_2\text{Cl}_2$  solvent. A zoomed image of LMCT band has been given in the inset of the image.

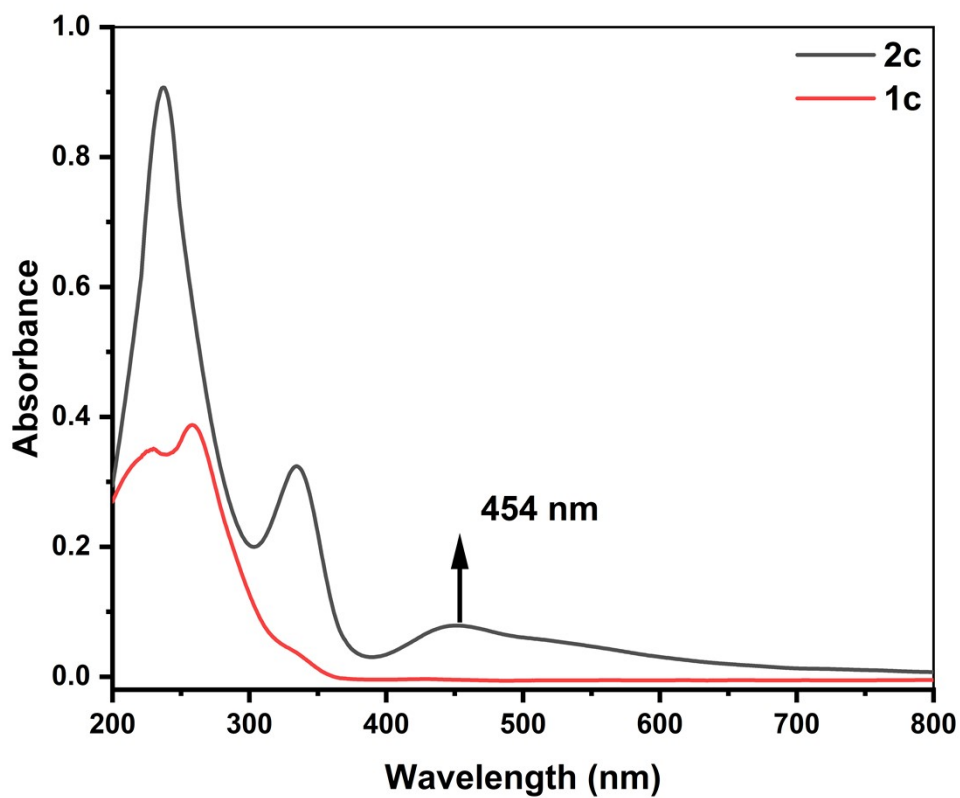

Figure S3. UV-Visible spectra of 2c and 1c in CH<sub>2</sub>Cl<sub>2</sub> solvent.

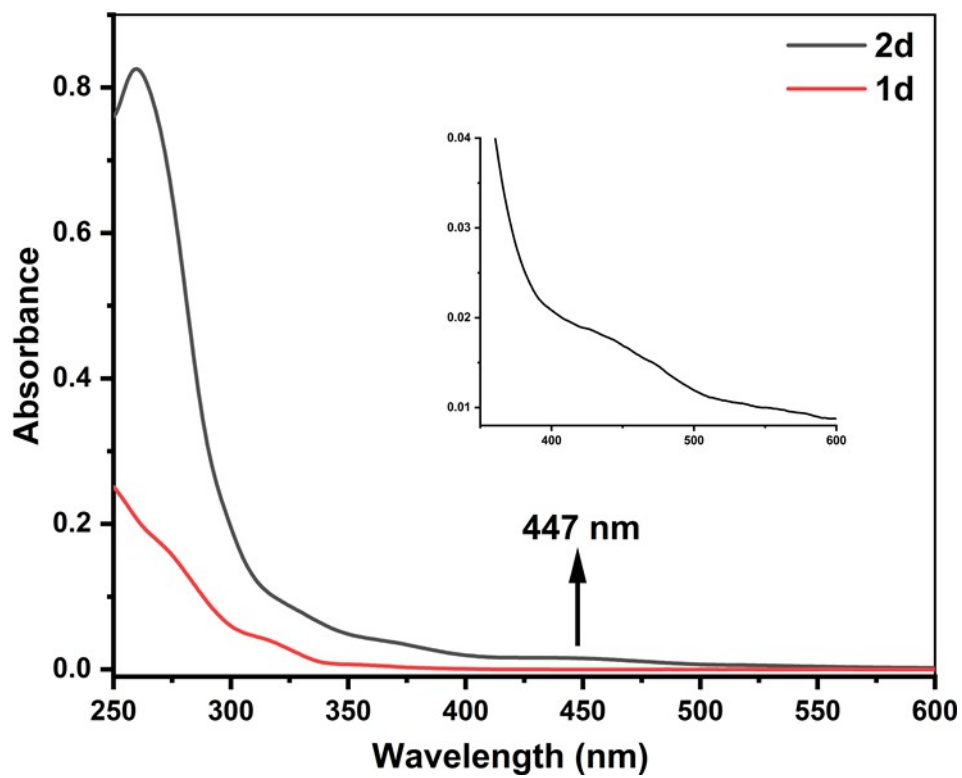

Figure S4. UV-Visible spectra of 2d and 1d in CH<sub>2</sub>Cl<sub>2</sub> solvent.

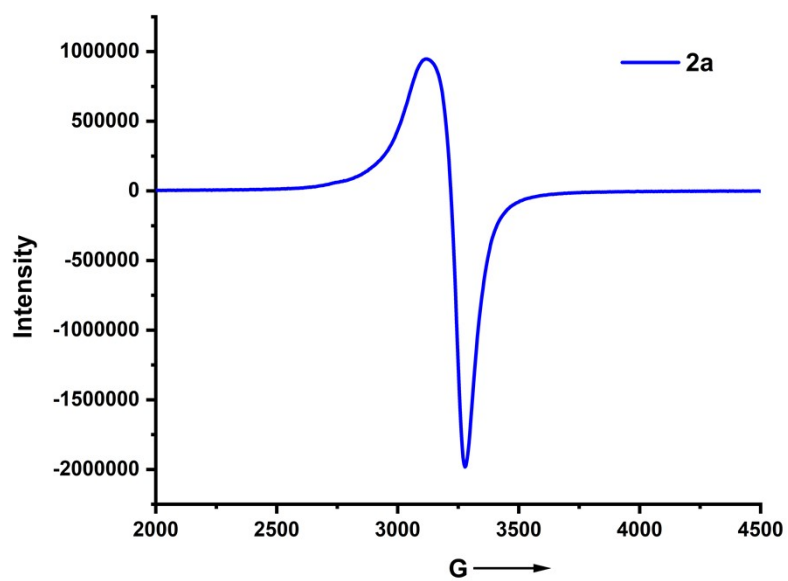

**Figure S5.** EPR spectra of **2a**.

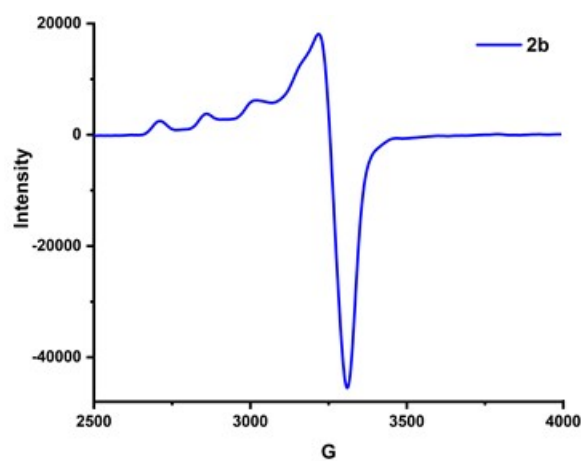

**Figure S6.** EPR spectra of **2b**.

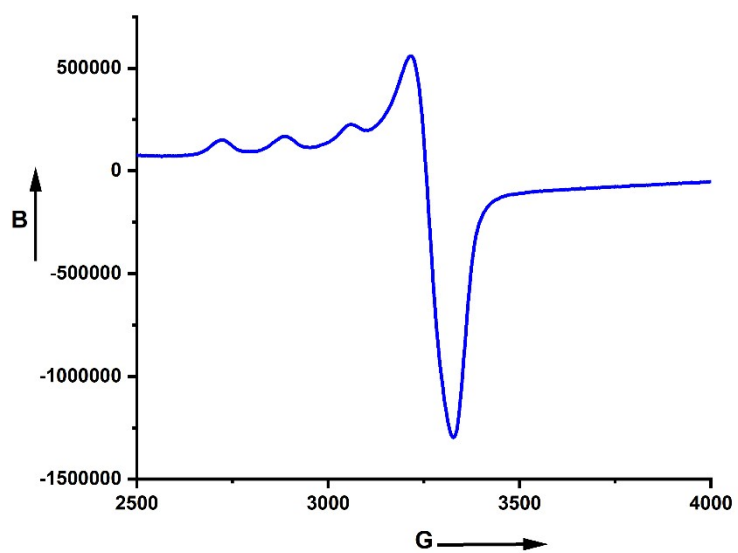

Figure S7. EPR spectra of 2c.

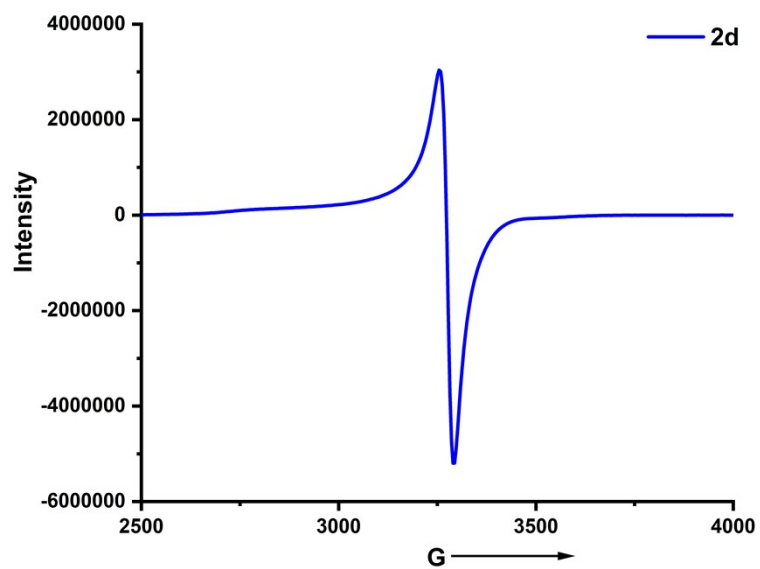

Figure S8. EPR spectra of 2d.

**SHAPE analysis:**

The coordination geometry of copper(II) selenoether complexes around copper metal ion is carefully analyzed by SHAPE 2.1<sup>2</sup> using respective CIF file.

**Table S1.** Summary of SHAPE analysis of **2b**

| Entry | Geometry      | Point group | CShM   |
|-------|---------------|-------------|--------|
| 1     | Square Planar | D4h         | 0.567  |
| 2     | Tetrahedral   | Td          | 28.550 |

**Table S2.** Summary of SHAPE analysis of **2c**

| Entry | Geometry                 | Point group | CShM   |
|-------|--------------------------|-------------|--------|
| 1     | Pentagon                 | D5h         | 23.697 |
| 2     | Vacant Octahedron        | C4v         | 6.417  |
| 3     | Trigonal Bipyramid       | D3h         | 8.053  |
| 4     | Spherical Square Pyramid | C4v         | 4.886  |

**Table S3.** Summary of SHAPE analysis of **2d**

| Entry | Geometry                   | Point group | CShM   |
|-------|----------------------------|-------------|--------|
| 1     | Hexagon                    | D6h         | 33.151 |
| 2     | Pentagonal Pyramid         | C5v         | 23.012 |
| 3     | Octahedron                 | Oh          | 5.376  |
| 4     | Trigonal Prism             | D3h         | 11.227 |
| 5     | Johnson Pentagonal Pyramid | C5v         | 24.791 |

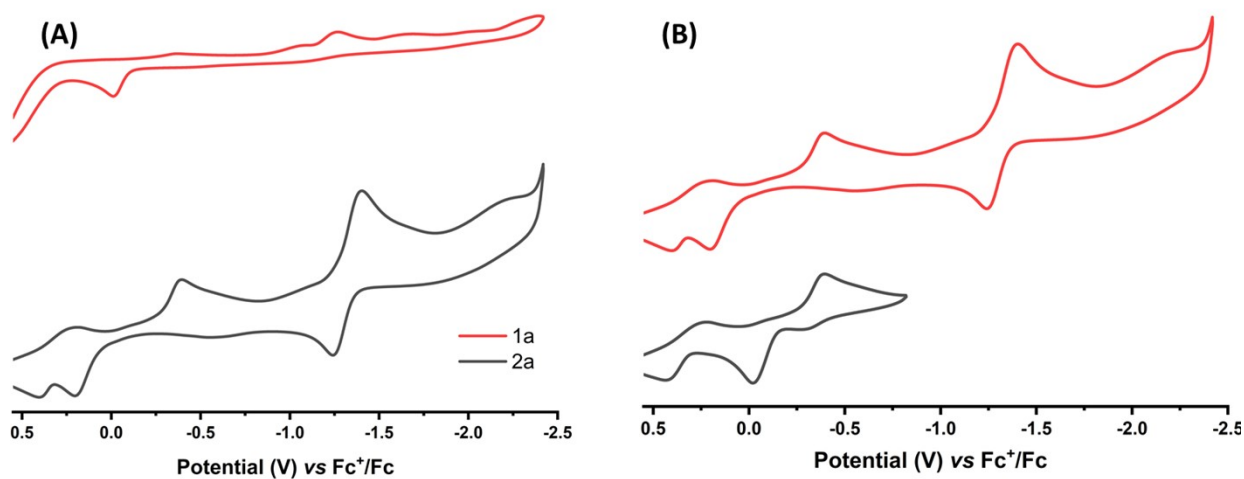

**Figure S9 A-B.** (A) Comparison of CV of **2a** and **1a**, and (B) CV of **2a** in DMF solvent using 0.1M *n*Bu<sub>4</sub>NPF<sub>6</sub> as a supporting electrolyte at 0.1V/s scan rate.

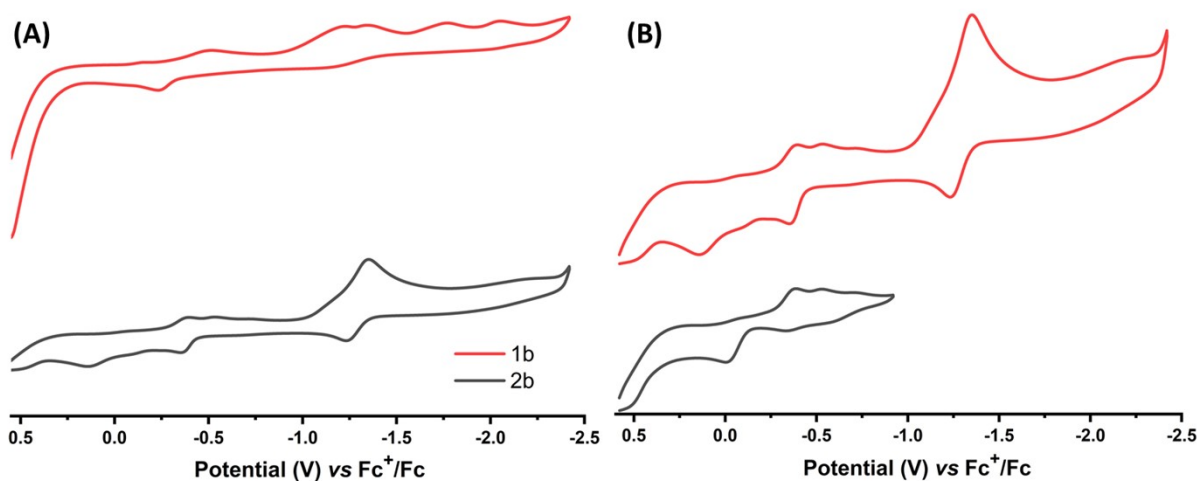

**Figure S10 A-B.** (A) Comparison of CV of **2b** and **1b**, and (B) CV of **2b** in DMF solvent using 0.1M *n*Bu<sub>4</sub>NPF<sub>6</sub> as a supporting electrolyte at 0.1V/s scan rate.

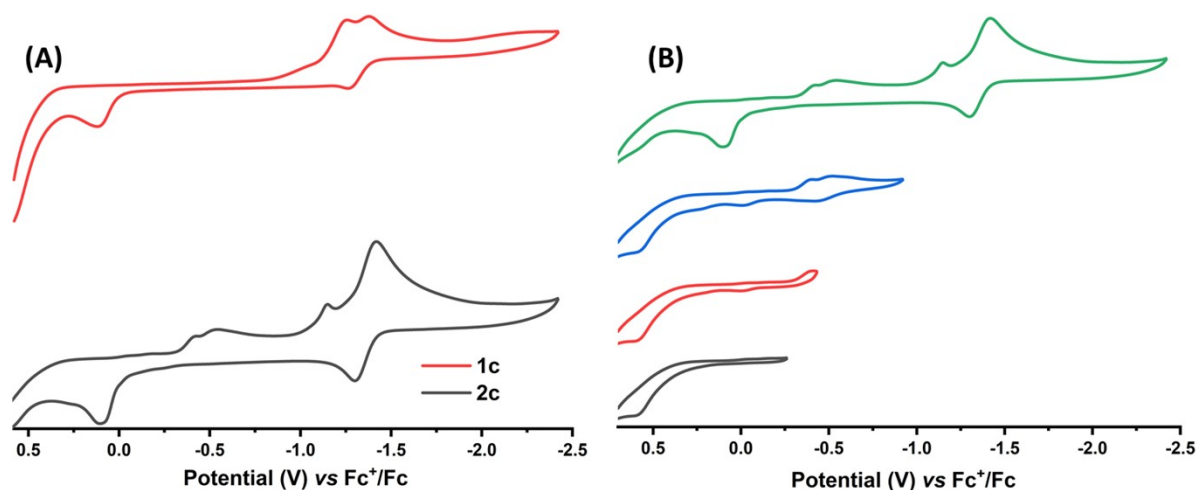

**Figure S11 A-B.** (A) Comparison of CV of **2c** and **1c**, and (B) CV of **2c** in DMF solvent using 0.1M *n*Bu<sub>4</sub>NPF<sub>6</sub> as a supporting electrolyte at 0.1V/s scan rate.

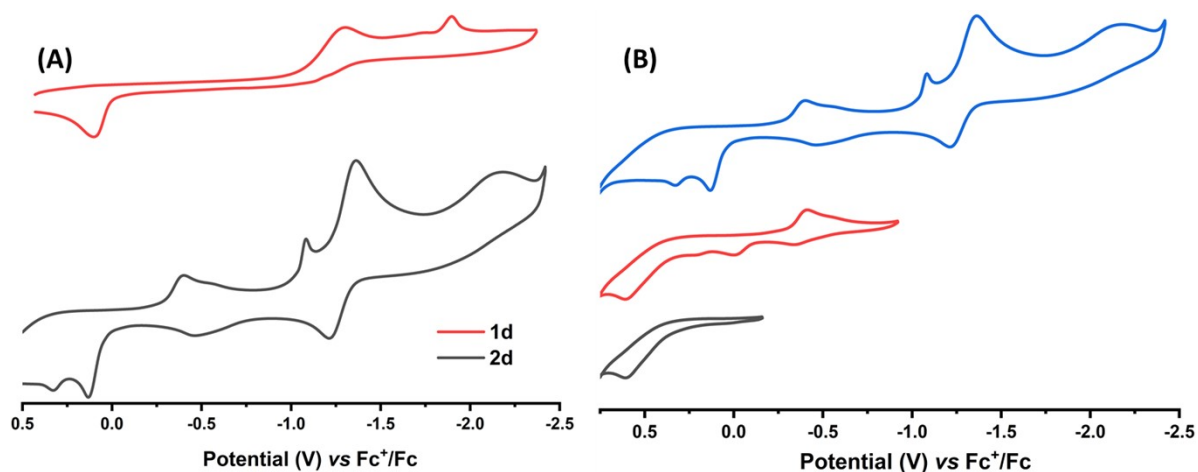

**Figure S12 A-B.** (A) Comparison of CV of **2d** and **1d**, and (B) CV of **2d** in DMF solvent using 0.1M *n*Bu<sub>4</sub>NPF<sub>6</sub> as a supporting electrolyte at 0.1V/s scan rate.

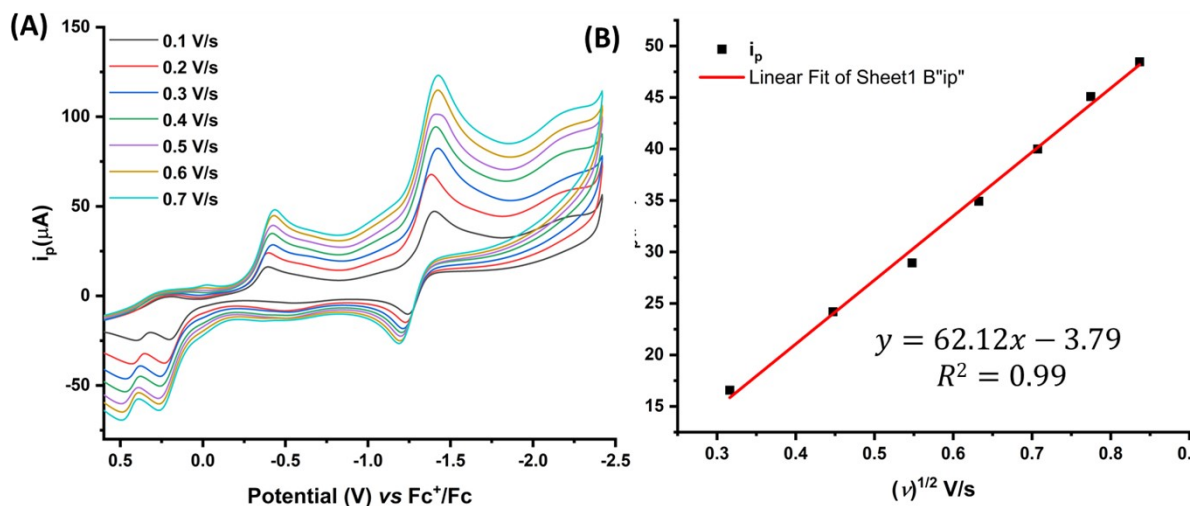

**Figure S13 A-B.** (A) CV study of **2a** at various scan rates. (B) Corresponding graph of  $i_{pc}$  vs square root of scan rate for Cu<sup>II</sup>/Cu<sup>I</sup> reduction using 0.1M <sup>n</sup>Bu<sub>4</sub>NPF<sub>6</sub> as a supporting electrolyte in DMF solvent.

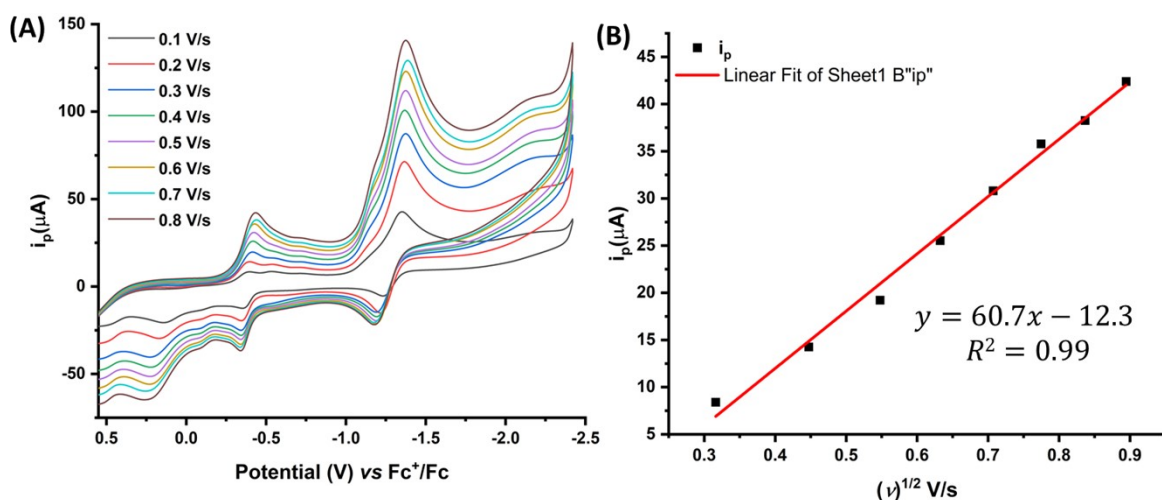

**Figure S14 A-B.** (A) CV study of **2b** at various scan rates. (B) Corresponding graph of  $i_{pc}$  vs square root of scan rate for Cu<sup>II</sup>/Cu<sup>I</sup> reduction using 0.1M <sup>n</sup>Bu<sub>4</sub>NPF<sub>6</sub> as a supporting electrolyte in DMF solvent.



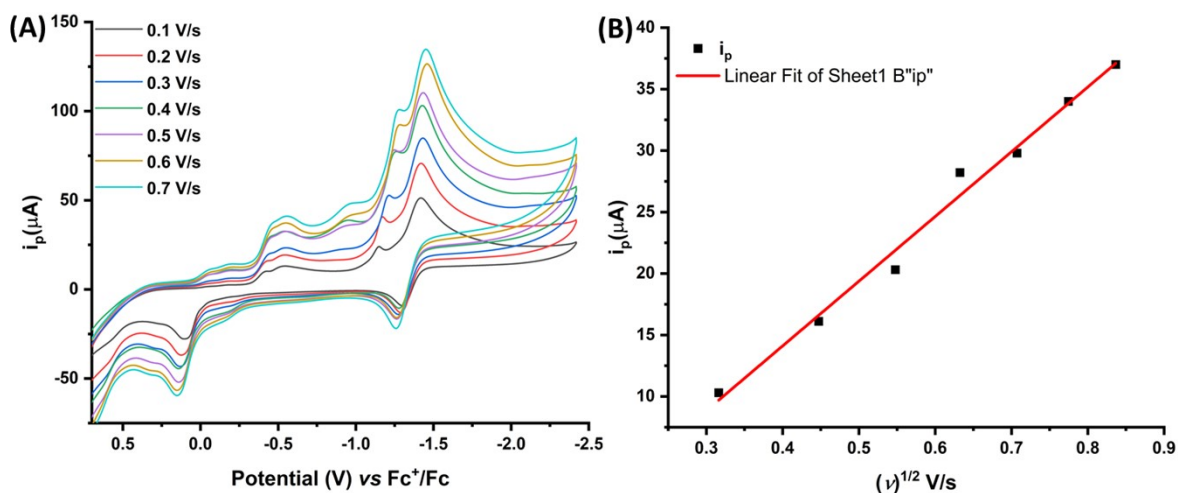

**Figure S15 A-B.** (A) CV study of **2c** at various scan rates. (B) Corresponding graph of  $i_{pc}$  vs square root of scan rate for Cu<sup>II</sup>/Cu<sup>I</sup> reduction using 0.1M <sup>n</sup>Bu<sub>4</sub>NPF<sub>6</sub> as a supporting electrolyte in DMF solvent.

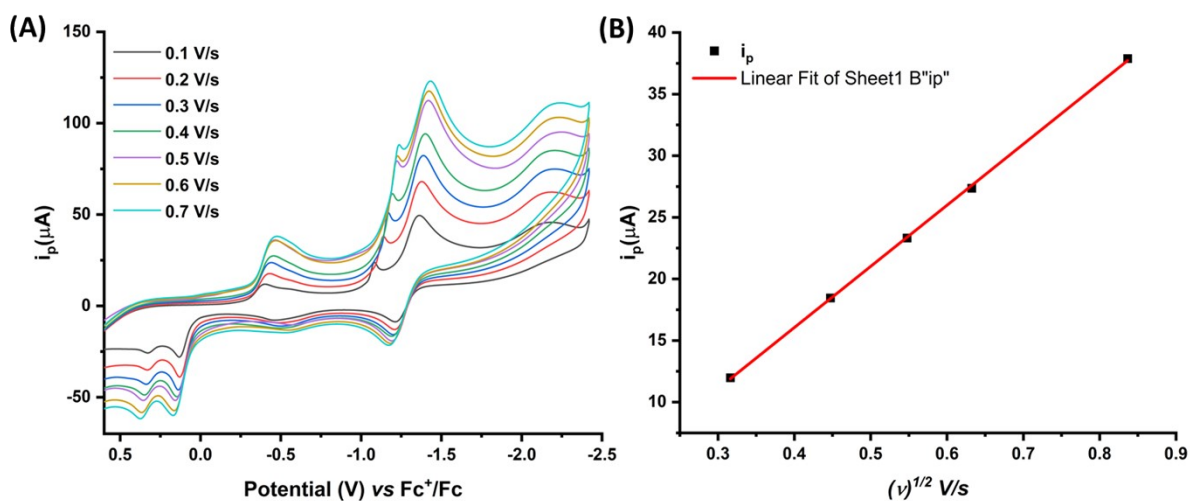

**Figure S16 A-B.** (A) CV study of **2d** at various scan rates. (B) Corresponding graph of  $i_{pc}$  vs square root of scan rate for Cu<sup>II</sup>/Cu<sup>I</sup> reduction using 0.1M <sup>n</sup>Bu<sub>4</sub>NPF<sub>6</sub> as a supporting electrolyte in DMF solvent.

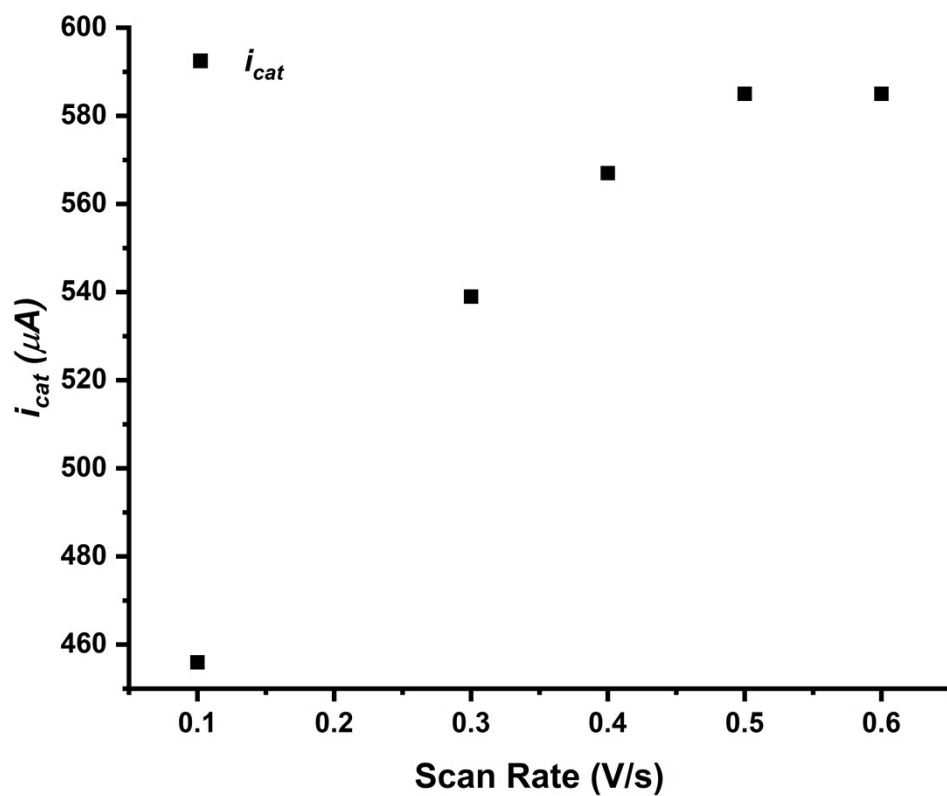

Figure S17.  $i_{cat}$  vs scan rate study of catalyst **2a** (0.5mM) at 28mM acetic acid concentration.

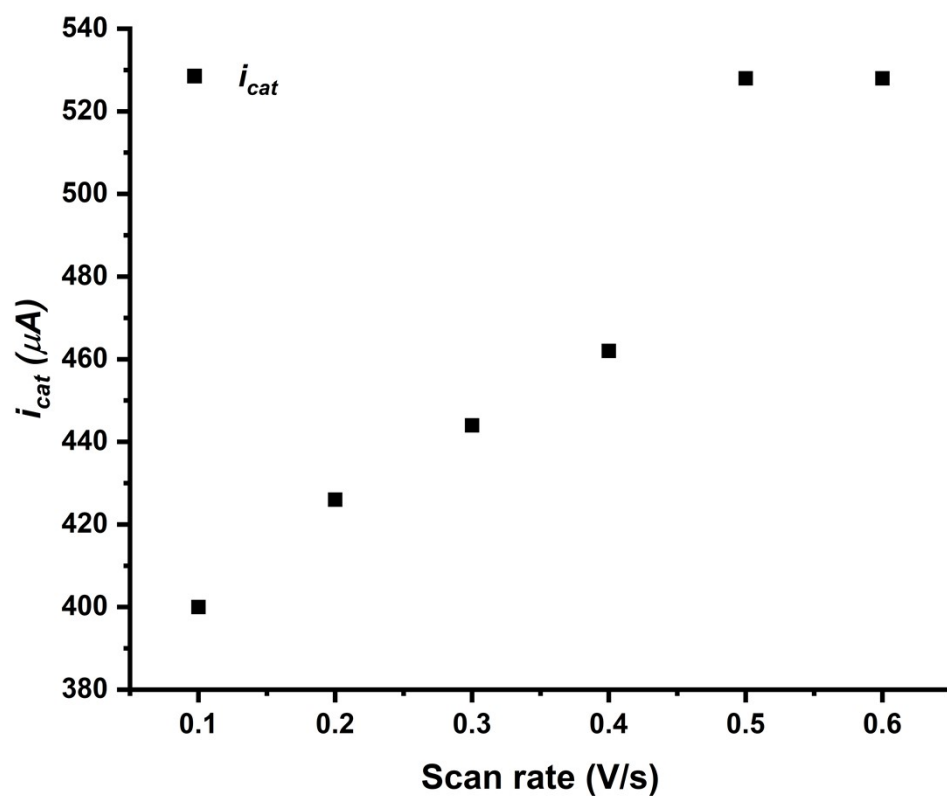

Figure S18.  $i_{cat}$  vs scan rate study of catalyst **2b** (0.5mM) at 22mM acetic acid concentration.

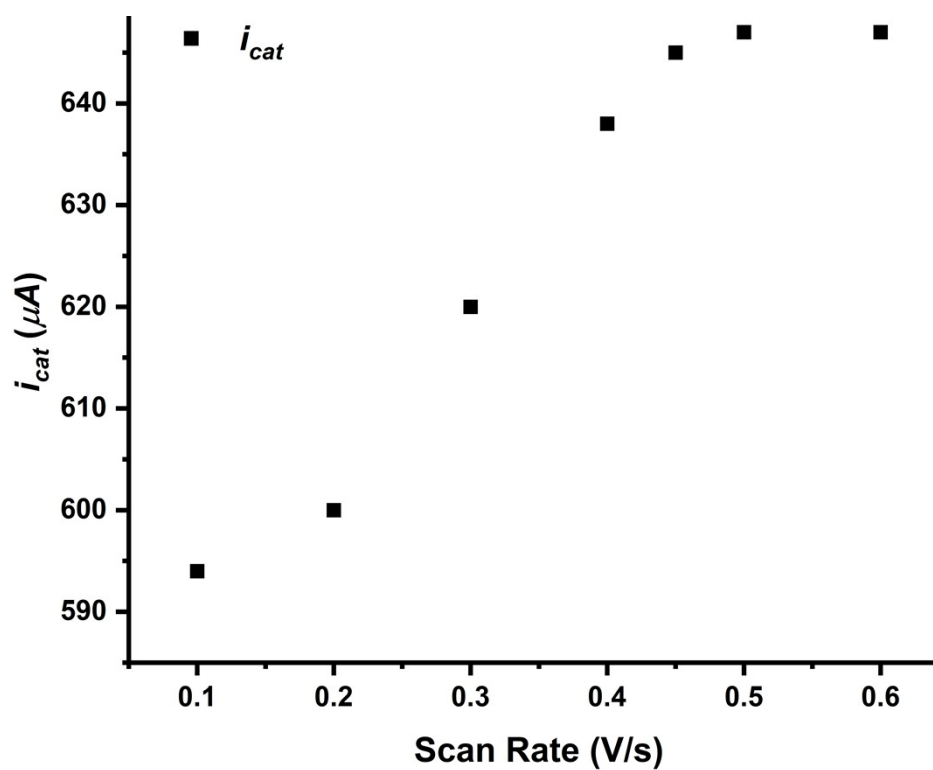

Figure S19.  $i_{cat}$  vs scan rate study of catalyst 2c (0.5mM) at 44mM acetic acid concentration.

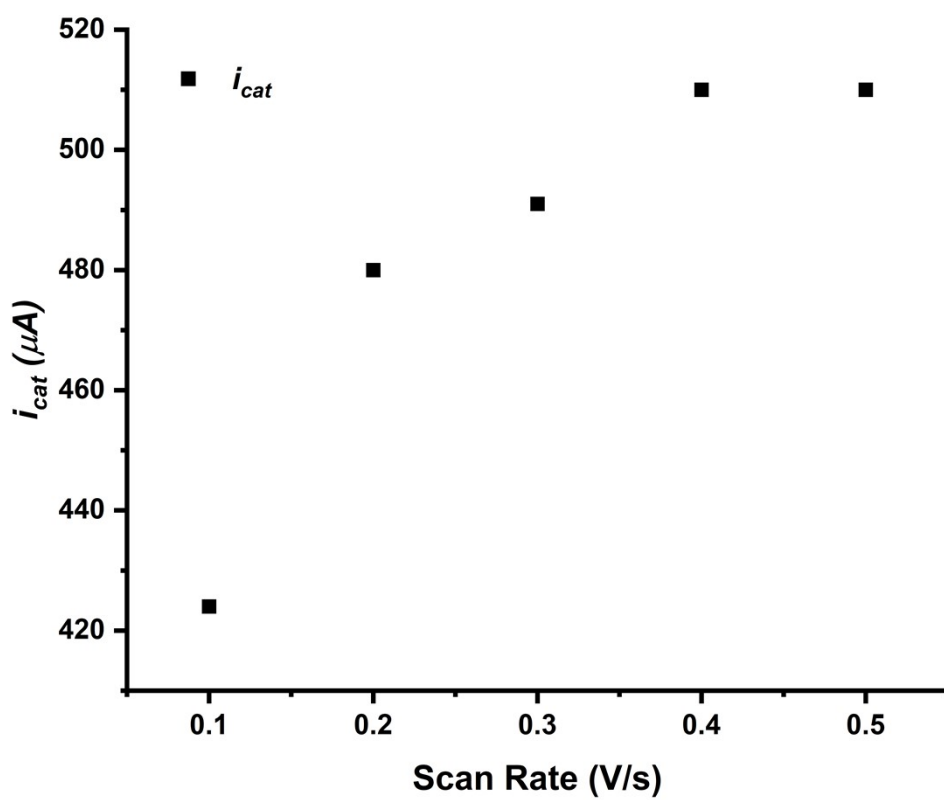

Figure S20.  $i_{cat}$  vs scan rate study of catalyst 2d (0.5mM) at 28mM acetic acid concentration.

## Quantitative estimation of evolved hydrogen by GC thermal detector

Vial# : 1  
 Sample Name : sks -ma-h2 pure1  
 Sample ID : 1.5ml  
 Sample Type : Unknown  
 Injection Volume :  
 ISTD Amount :  
 Data Name : D:\test\MA\08.06.2019\sks -ma-h2 pure1.gcd  
 Method Name : D:\test\MA\h2 and co2.gcm

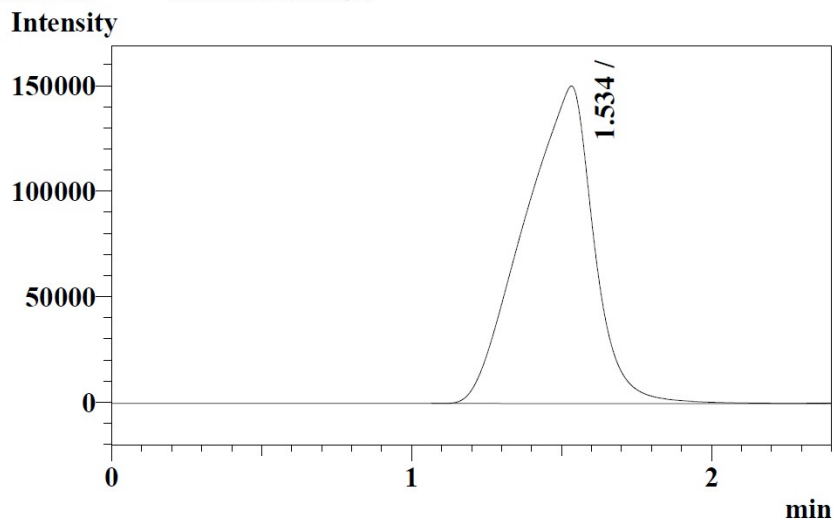

Figure S21. GC-TCD scan of pure hydrogen gas injected by Hamilton gas tight syringe.

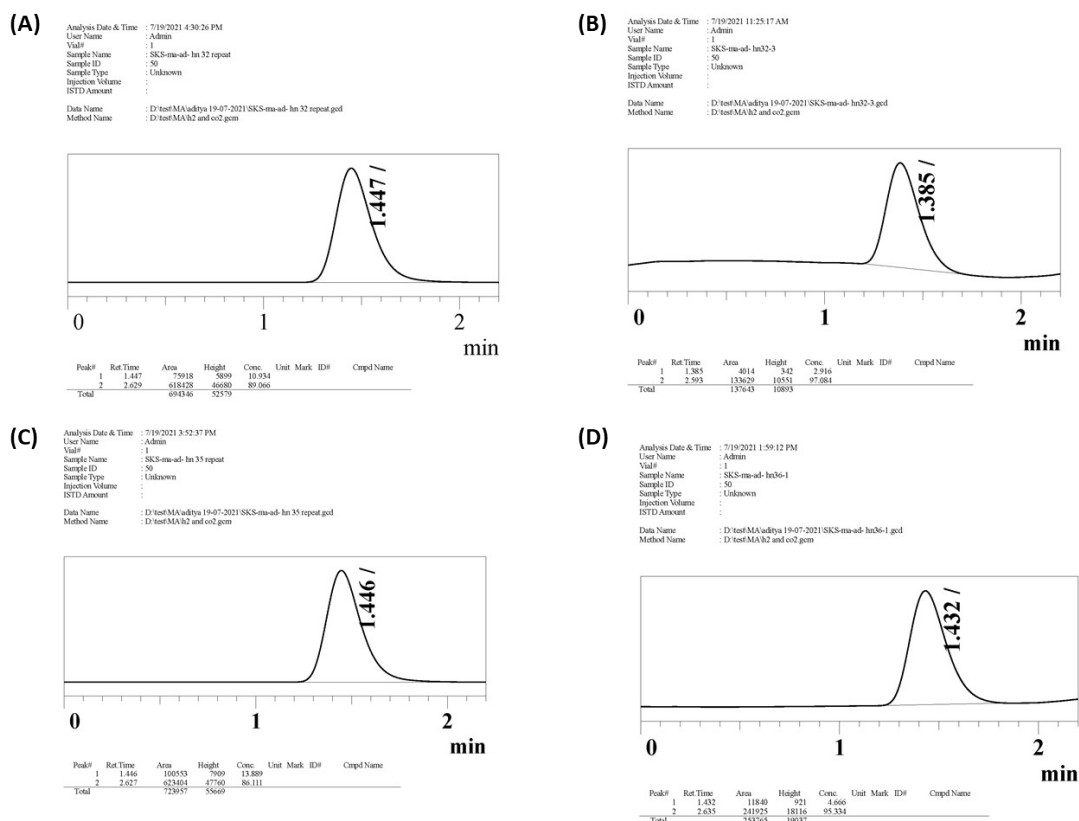

Figure S22 A-D. GC TCD readout of catalysts (A) 2a, (B) 2b, (C) 2c, and (D) 2d during electrolysis

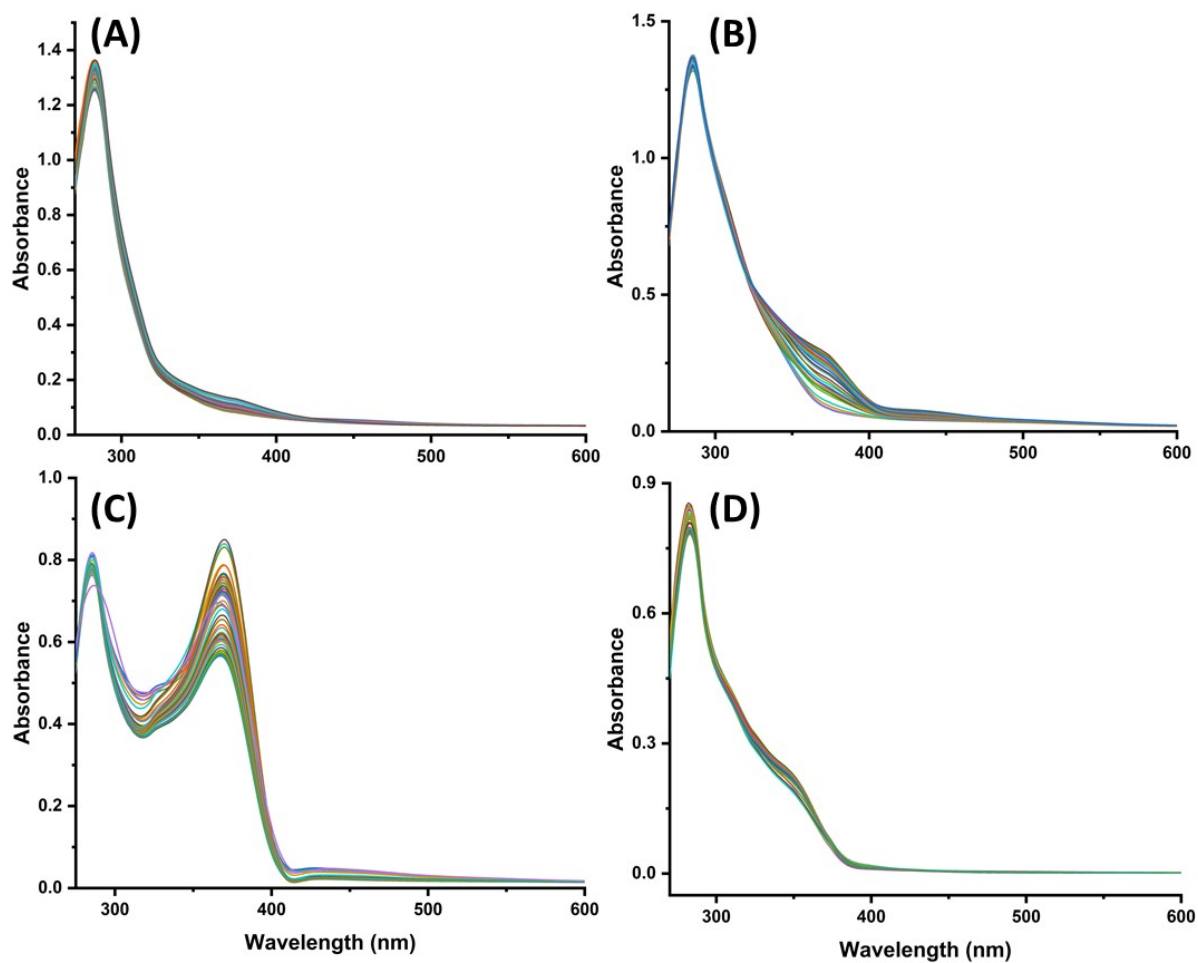

**Figure S23.** UV-visible spectra of electrocatalytic solution during the constant potential electrolysis (CPE) study at -2.2 V vs  $\text{Fc}^+/\text{Fc}$  of catalyst **2a** (A), catalyst **2b** (B), catalyst **2c** (C), and catalyst **2d** (D), in DMF solvent using 0.1M  $n\text{Bu}_4\text{NPF}_6$  as a supporting electrolyte.

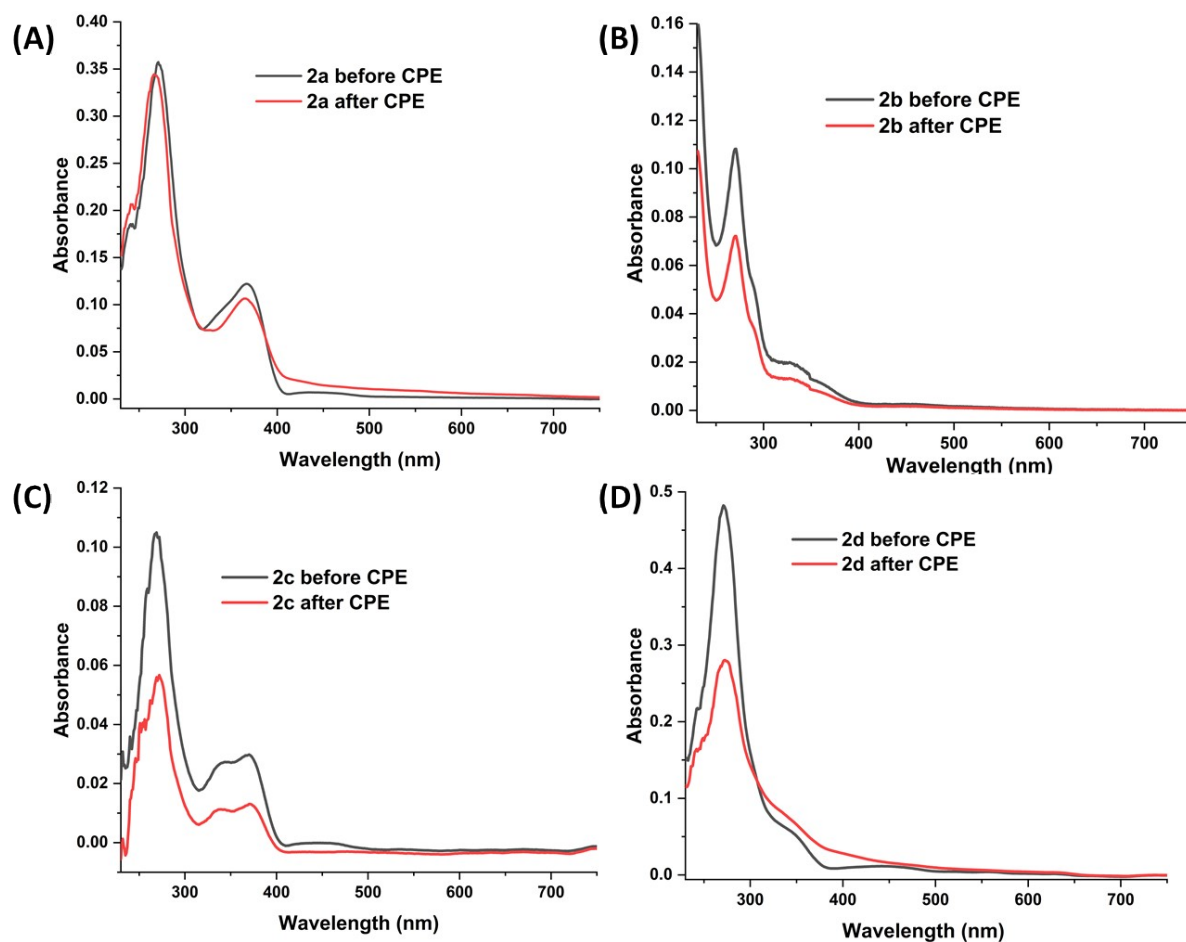

**Figure 24.** UV-visible comparison of electrocatalytic solution before and after the constant potential electrolysis (CPE) study of catalyst **2a** (A), catalyst **2b** (B), catalyst **2c** (C), and catalyst **2d** (D), in DMF solvent using 0.1M  $n\text{Bu}_4\text{NPF}_6$  as a supporting electrolyte.

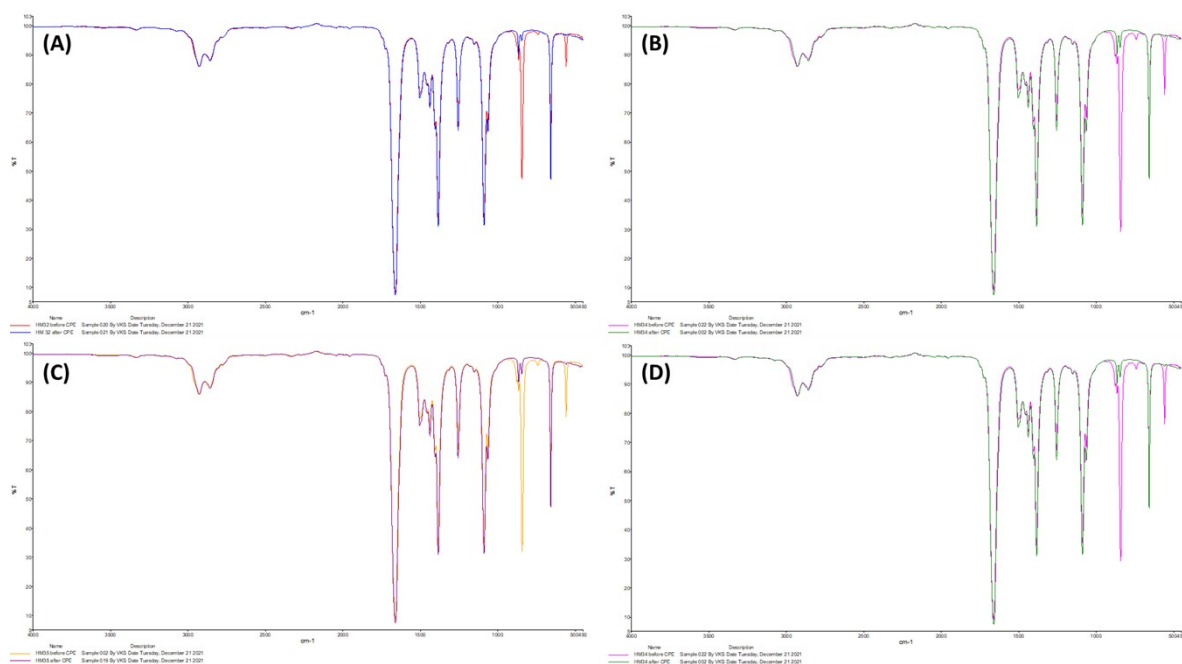

**Figure 25.** IR comparison of electrocatalytic solution of acetic acid and catalyst **2a** (A), catalyst **2b** (B), catalyst **2c** (C), and catalyst **2d** (D), in DMF solvent using 0.1M  $n\text{Bu}_4\text{NPF}_6$  as a supporting electrolyte.

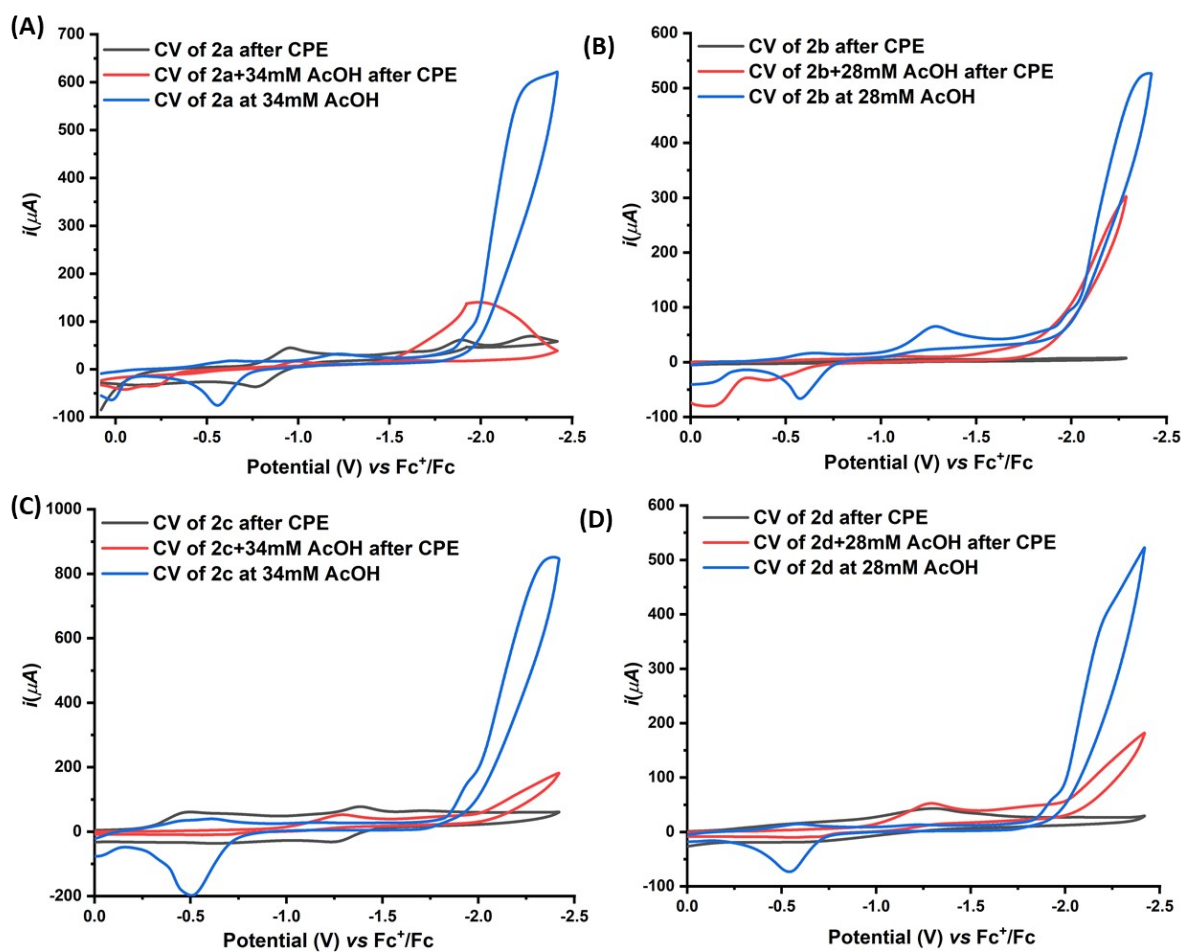

**Figure 26.** CV of catalysts before and after CPE using 0.1mM **2a-2d** at corresponding saturated acetic acid concentration.



**Post electrolysis Dip test:** The constant pulse electrolysis (CPE) study was performed on **2a-2d** (1mM) using  $n\text{Bu}_4\text{NPF}_6$  (0.1M) electrolyte and acetic acid (12mM) for 2h. The electrode was then removed, rinsed with DI water and placed in a new cell containing acetic acid and 0.1M  $n\text{Bu}_4\text{NPF}_6$  in the absence of catalysts **2a-2d** and CPE studies were performed for 2h. In the presence of complexes **2a-2d**, an appreciable charge was produced in the CPE study. By using the same electrode after rinsing with DI water and in the absence of catalysts **2a-2d**, no significant charge was observed in the CPE study. Next, the post electrolysis dip test for **2a-2d** suggests that electrocatalytically active film is not generated over the time of electrolysis. Therefore, catalysis under this condition seems attributed to homogeneous catalysis.

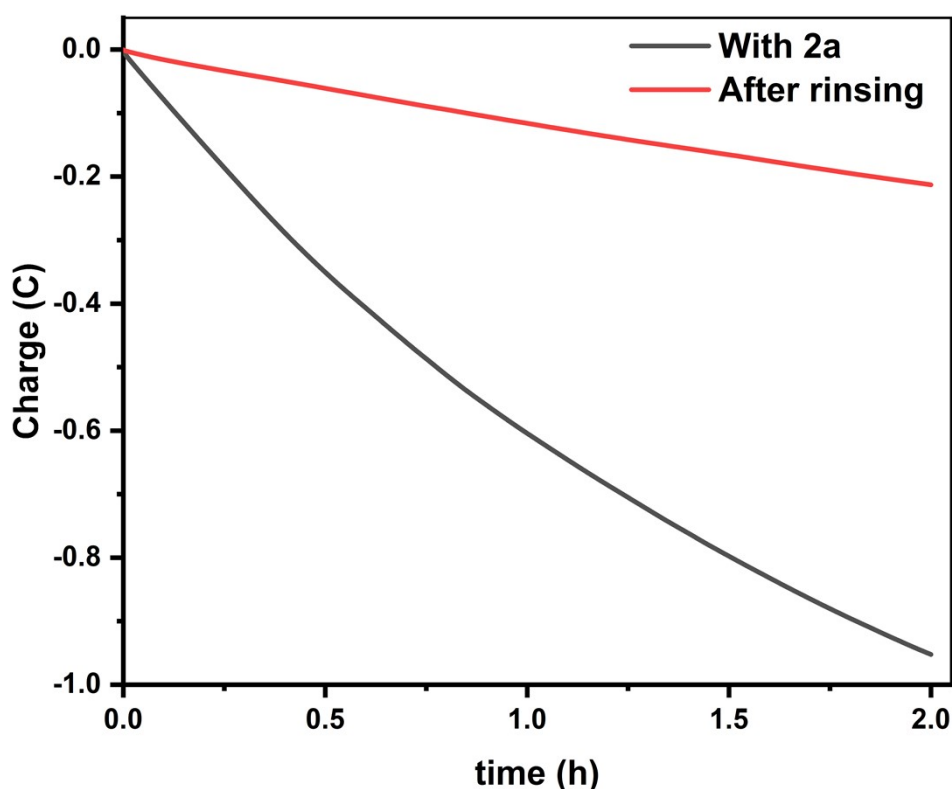

**Figure S27.** Post electrolysis rinse test for **2a**.

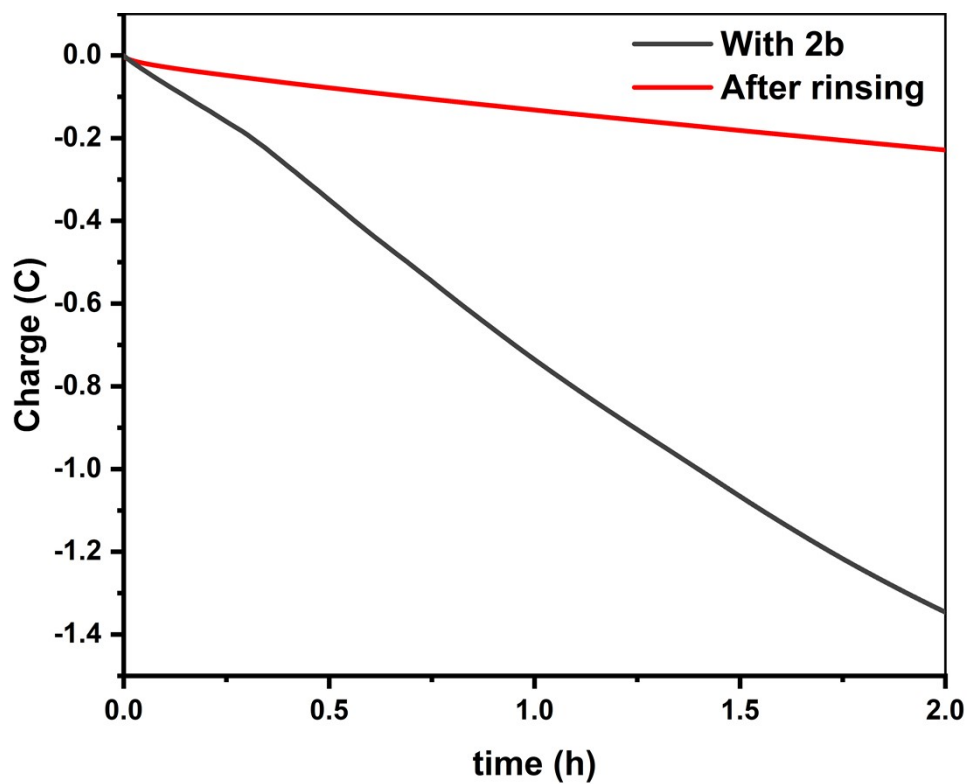

Figure S28. Post electrolysis rinse test for 2b.

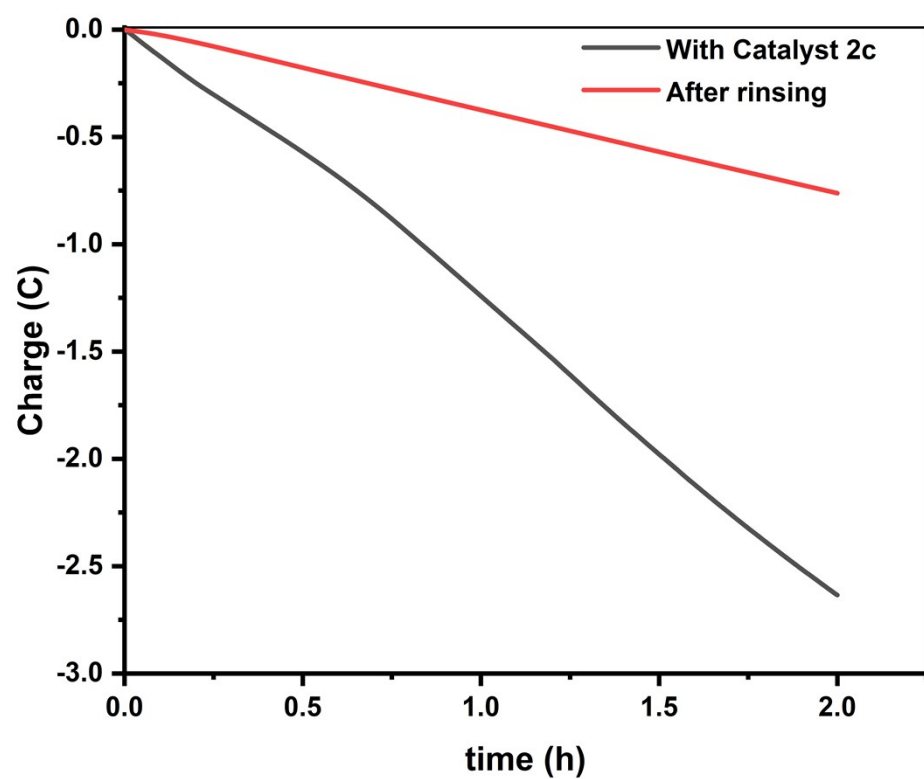

Figure S29. Post electrolysis rinse test for 2c.

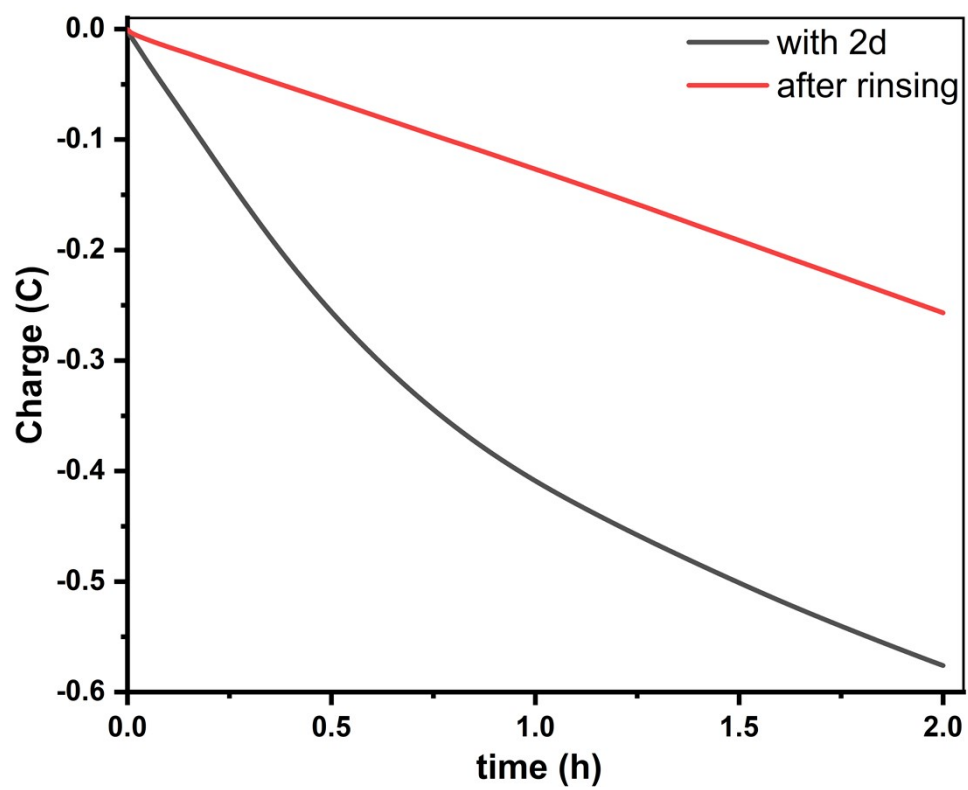

Figure S30. Post electrolysis rinse test for 2d.

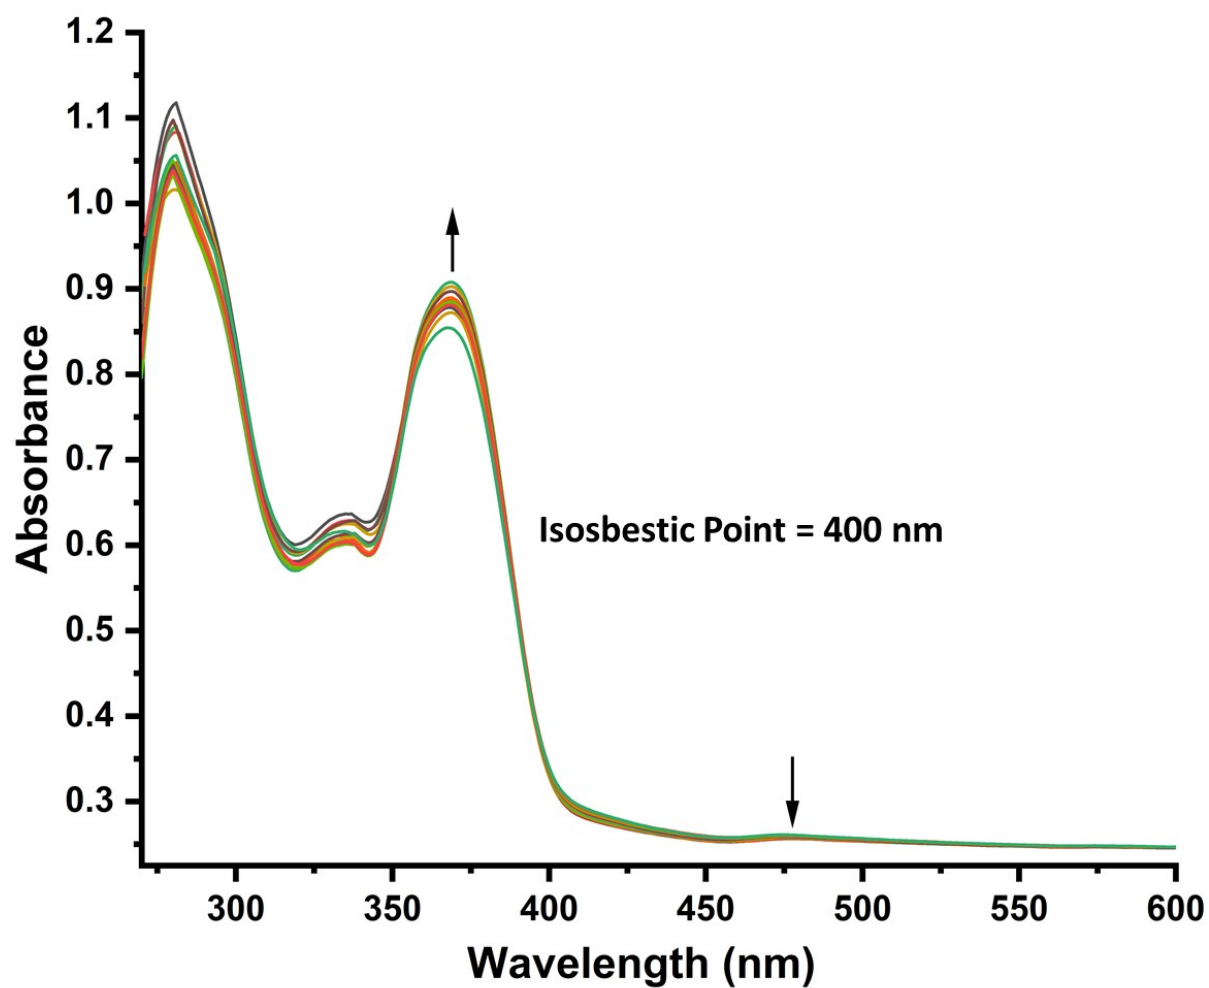

**Figure S31.** UV analysis of reaction mixture at -2.2 V vs  $\text{Fc}^+/\text{Fc}$  containing catalyst **2c** (0.03mM), acetic acid (15mM) in DMF solvent by using  $\text{TBAPF}_6$  (0.1 M) as a supporting electrolyte.

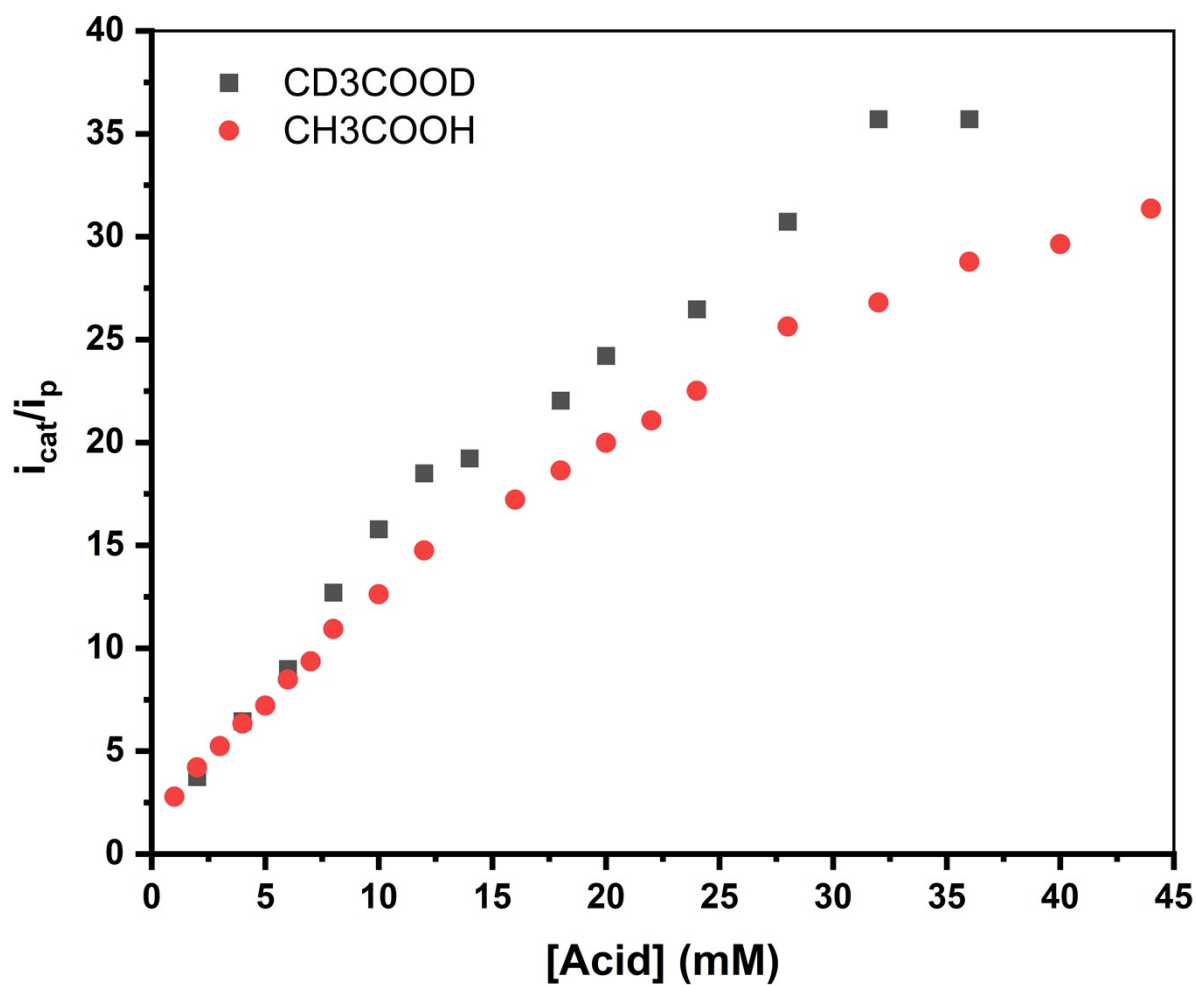

**Figure S32.** The comparison graph of  $i_{cat}/i_p$  vs concentration of acetic acid and deuterated acetic acid of **2c**.

$$KIE = \left( \frac{\text{Slope}_{CH_3COOH}}{\text{Slope}_{CD_3COOD}} \right)^2$$

$i_{cat}/i_p$  vs [Acid]

$$\text{Slope}_{CH_3COOH} = 0.83, R^2 = 0.98$$

$$\text{Slope}_{CD_3COOD} = 0.93, R^2 = 0.98$$

$$KIE = \left( \frac{0.83}{0.93} \right)^2 KIE = 0.69$$

### DFT Calculations:

All computational studies were performed with the Gaussian 09 Revision A.02 program suite with the DFT method of Becke's three parameter hybrid Hartree-Fock procedure with the Lee-Yang-Parr correlation function (B3LYP). The geometry optimization and energy calculations of the reactants, intermediates, and transition state in this study were fully optimized by DFT/B3LYP method with the 6-31+g(d) basis set in gas phase.

**Table S4.** Comparison of bond lengths and bond angles of experimentally obtained structure of copper(II) selenolate complex **2c** (see Table S5) and calculated structure using DFT/B3LYP/6-31+g(d). In experiment, copper(II) selenolate complex **2c** crystallizes with CH<sub>2</sub>Cl<sub>2</sub>: hexane. Relative error presented here are calculated as (|calculated – experimental|/ experimental) × 100.

| <b>Bond Distance</b> | <b>Experimental</b> | <b>Calculated</b> | <b>%Error</b> |
|----------------------|---------------------|-------------------|---------------|
| Cu-N1                | 1.969               | 2.025             | 2.8           |
| Cu-N2                | 2.004               | 2.037             | 1.6           |
| Cu-O1                | 1.924               | 1.924             | 0             |
| Cu-O2                | 1.928               | 1.926             | 0.1           |
| Cu-Se1               | 3.042               | 2.752             | 9.5           |
| Cu-Se2               | 3.106               | 3.074             | 1.0           |
| <b>Bond Angle</b>    |                     |                   |               |
| N1-Cu-N2             | 82.21               | 81.25             | 1.1           |
| Se1-Cu-Se2           | 137.11              | 139.04            | 1.4           |
| O1-Cu-N2             | 171.69              | 168.32            | 1.9           |

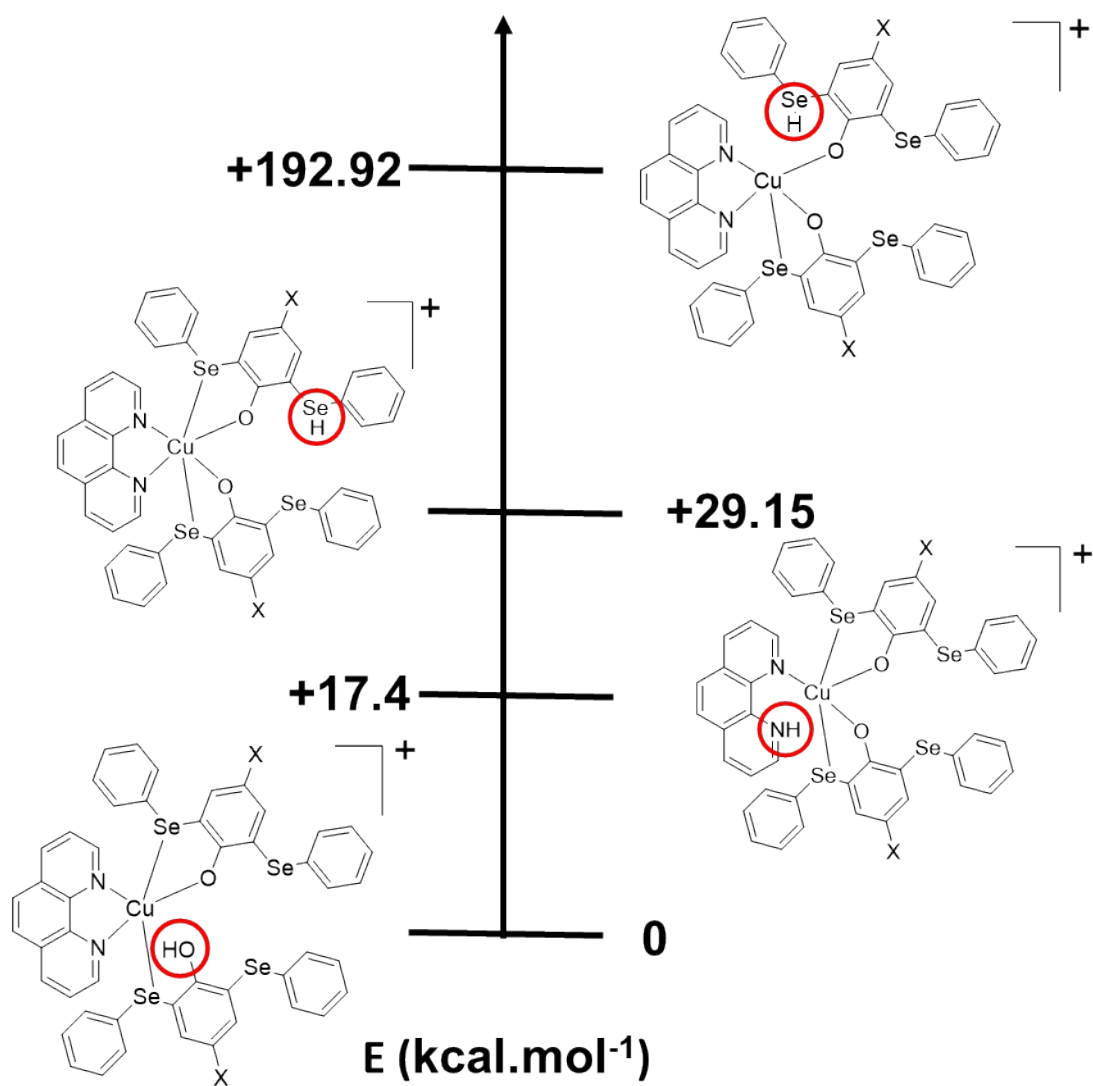

**Figure S33.** Energetic stability of the protonated species of **2c** ( $X=CHO$ ) in the singlet ( $S = 1$ ) electronic states using B3LYP/6-31+g(d) basis set in gas phase.

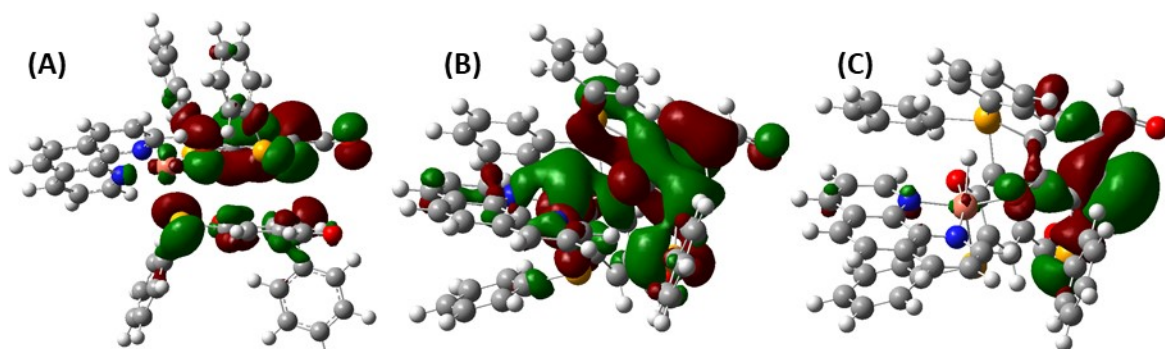

**Figure S34 A-C:** SOMO picture of radical cation intermediate **II** in the scheme 2, main manuscript (A); HOMO-1 picture (B) and HOMO picture (C) of copper hydride intermediate **III** in the scheme 2.

### Cartesian Coordinates of the optimized structures:

2c

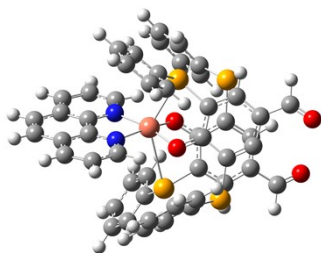

| Symbol | X        | Y        | Z        |
|--------|----------|----------|----------|
| Se     | -0.08131 | -0.4365  | -2.72565 |
| Se     | -2.30863 | -2.34725 | 2.23357  |
| Se     | 0.088539 | 0.433683 | 2.660864 |
| Se     | -2.48348 | 2.05498  | -2.16477 |
| Cu     | 1.008071 | 0.071694 | -0.24992 |
| O      | -0.2238  | 1.548222 | -0.20346 |
| O      | -0.22351 | -1.32666 | 0.237642 |
| N      | 2.561779 | -1.17748 | 0.105803 |
| N      | 2.532867 | 1.408668 | -0.45102 |
| C      | -1.32364 | -1.52766 | -0.39072 |
| O      | -6.17926 | 2.085342 | 2.01027  |
| C      | -2.46582 | -2.06254 | 0.340167 |
| C      | -1.35697 | 1.517045 | 0.425575 |
| C      | -2.56386 | 1.863533 | -0.26165 |
| C      | -1.46406 | 1.165294 | 1.801054 |
| C      | 3.747393 | 0.853902 | -0.22584 |
| O      | -6.15817 | -2.59211 | -1.87022 |
| C      | -3.604   | -2.25095 | -0.34159 |
| C      | -2.70611 | -1.57786 | -2.41586 |
| H      | -2.81399 | -1.3511  | -3.47595 |
| C      | 3.764747 | -0.55238 | 0.057784 |
| C      | -3.77034 | 1.939331 | 0.410709 |



|   |          |          |          |
|---|----------|----------|----------|
| H | -4.68091 | 2.224314 | -0.10753 |
| C | -2.68616 | 1.208543 | 2.453994 |
| H | -2.74347 | 0.920538 | 3.500837 |
| C | -1.49896 | -1.3136  | -1.7875  |
| C | -1.27861 | 3.545211 | -2.35052 |
| C | -3.8299  | -2.0519  | -1.69766 |
| C | -0.90675 | -3.6677  | 2.290434 |
| C | 4.991163 | -1.21488 | 0.280414 |
| C | -3.84805 | 1.617277 | 1.780209 |
| C | 0.962422 | -1.95065 | -3.33982 |
| C | 2.523987 | -2.47976 | 0.35789  |
| H | 1.536555 | -2.92531 | 0.395641 |
| C | 1.466246 | -4.30943 | -3.52127 |
| H | 1.208787 | -5.34118 | -3.29508 |
| C | -1.03607 | -4.88212 | 1.60722  |
| H | -1.91489 | -5.06182 | 0.995296 |
| C | 2.601525 | -4.02355 | -4.2807  |
| H | 3.232133 | -4.82765 | -4.64974 |
| C | 0.808254 | 2.017171 | 3.506057 |
| C | 4.951682 | 1.590318 | -0.25459 |
| C | 2.449307 | 2.710691 | -0.68857 |
| H | 1.447661 | 3.097424 | -0.84507 |
| C | -0.25845 | 3.469775 | -3.3049  |
| H | -0.11579 | 2.549619 | -3.86424 |
| C | 2.103438 | -1.66199 | -4.10009 |
| H | 2.355725 | -0.62986 | -4.33441 |
| C | 2.088684 | 2.965211 | 5.336254 |
| H | 2.622778 | 2.829621 | 6.273447 |
| C | -1.44947 | 4.717885 | -1.60772 |
| H | -2.25129 | 4.780432 | -0.87821 |
| C | 0.647885 | -3.28055 | -3.04958 |
| H | -0.23166 | -3.51657 | -2.45928 |
| C | 6.205234 | -0.44761 | 0.231975 |
| H | 7.148025 | -0.95918 | 0.405603 |
| C | 4.925474 | -2.602   | 0.547524 |
| H | 5.841115 | -3.16024 | 0.724763 |
| C | 0.21134  | -3.43855 | 3.099433 |
| H | 0.321429 | -2.48144 | 3.600103 |
| C | 2.916908 | -2.69354 | -4.56785 |
| H | 3.795757 | -2.45573 | -5.16192 |
| C | 1.503726 | 1.862877 | 4.711498 |
| H | 1.579365 | 0.880155 | 5.170516 |
| C | 6.186442 | 0.894862 | -0.01823 |
| H | 7.113846 | 1.46051  | -0.04397 |
| C | 3.695146 | -3.2297  | 0.583357 |
| H | 3.606875 | -4.28974 | 0.794121 |
| C | 3.594117 | 3.531223 | -0.73285 |
| H | 3.477195 | 4.589578 | -0.93967 |

|   |          |          |          |
|---|----------|----------|----------|
| C | 0.696149 | 3.292011 | 2.939221 |
| H | 0.170299 | 3.424173 | 1.999155 |
| C | 4.841851 | 2.974788 | -0.52126 |
| H | 5.737997 | 3.588993 | -0.55516 |
| C | 1.068903 | -5.63411 | 2.539749 |
| H | 1.828366 | -6.40467 | 2.646564 |
| C | -5.12861 | 1.70243  | 2.496068 |
| H | -5.07996 | 1.386229 | 3.562949 |
| C | -5.1285  | -2.19427 | -2.37896 |
| H | -5.09634 | -1.91129 | -3.45685 |
| C | 0.427209 | 5.728138 | -2.76072 |
| H | 1.082836 | 6.579523 | -2.92463 |
| C | 1.26988  | 4.393619 | 3.57498  |
| H | 1.169028 | 5.38062  | 3.129965 |
| C | 1.969931 | 4.236782 | 4.773157 |
| H | 2.414004 | 5.097422 | 5.266008 |
| C | -0.58714 | 5.797629 | -1.80081 |
| H | -0.72206 | 6.703576 | -1.21511 |
| C | 0.583968 | 4.564042 | -3.51643 |
| H | 1.368543 | 4.500983 | -4.26664 |
| C | -0.04089 | -5.85367 | 1.717578 |
| H | -0.14465 | -6.79334 | 1.180895 |
| C | 1.188566 | -4.4283  | 3.234338 |
| H | 2.048582 | -4.24976 | 3.875201 |

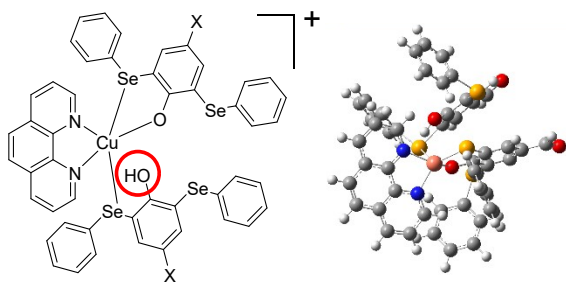

| Symbol | X        | Y        | Z        |
|--------|----------|----------|----------|
| Se     | -0.76937 | -0.0564  | 2.426881 |
| Se     | -0.19634 | -3.75301 | -2.08463 |
| Se     | 0.185736 | 1.121746 | -2.11878 |
| Se     | 4.051513 | -0.7594  | 1.734479 |
| Cu     | -1.23153 | 0.870272 | 0.074371 |
| O      | 1.734068 | 0.888192 | 0.587433 |
| O      | -1.04889 | -1.0861  | -0.46592 |
| N      | -3.28493 | 1.209689 | -0.46781 |
| N      | -1.38548 | 2.898588 | 0.482004 |
| C      | -0.39666 | -1.89407 | 0.262429 |
| O      | 4.872326 | -3.19074 | -3.25663 |
| C      | 0.106591 | -3.16108 | -0.28689 |

|   |          |          |          |
|---|----------|----------|----------|
| C | 2.26553  | 0.074812 | -0.35735 |
| C | 3.353719 | -0.77638 | -0.0629  |
| C | 1.730397 | 0.084065 | -1.65236 |
| C | -2.63908 | 3.390161 | 0.29234  |
| O | 2.404255 | -5.75267 | 2.350053 |
| C | 0.755712 | -3.91147 | 0.59058  |
| C | 0.497333 | -2.62375 | 2.451613 |
| H | 0.691597 | -2.39783 | 3.501988 |
| C | -3.65187 | 2.490715 | -0.21133 |
| C | 3.88356  | -1.60028 | -1.04655 |
| H | 4.709858 | -2.26892 | -0.82345 |
| C | 2.289859 | -0.72653 | -2.63711 |
| H | 1.879242 | -0.69875 | -3.64346 |
| C | -0.17698 | -1.7112  | 1.666252 |
| C | 5.283241 | 0.742801 | 1.578615 |
| C | 1.049057 | -3.83395 | 1.922762 |
| C | -2.13316 | -3.81572 | -2.11898 |
| C | -4.96638 | 2.969954 | -0.4346  |
| C | 3.365489 | -1.57329 | -2.35202 |
| C | -2.48842 | -0.59618 | 3.151355 |
| C | -4.18973 | 0.366164 | -0.94993 |
| H | -3.8474  | -0.64732 | -1.14265 |
| C | -4.49189 | -1.93433 | 3.127329 |
| H | -5.09714 | -2.71318 | 2.670904 |
| C | -2.82601 | -4.71675 | -1.30343 |
| H | -2.28306 | -5.35053 | -0.60851 |
| C | -4.94177 | -1.28488 | 4.281811 |
| H | -5.89514 | -1.55958 | 4.724202 |
| C | 0.965518 | 2.880842 | -2.36708 |
| C | -2.97122 | 4.742561 | 0.555786 |
| C | -0.42679 | 3.717133 | 0.904524 |
| H | 0.563477 | 3.284777 | 1.009509 |
| C | 5.113593 | 1.844037 | 2.422944 |
| H | 4.284811 | 1.873564 | 3.125038 |
| C | -2.91906 | 0.045905 | 4.315851 |
| H | -2.29461 | 0.795254 | 4.795996 |
| C | 0.717679 | 5.061396 | -3.38292 |
| H | 0.138252 | 5.756359 | -3.9849  |
| C | 6.352938 | 0.694546 | 0.679609 |
| H | 6.494309 | -0.17042 | 0.038503 |
| C | -3.27012 | -1.58514 | 2.548059 |
| H | -2.92929 | -2.09129 | 1.65036  |
| C | -5.27425 | 4.342829 | -0.14243 |
| H | -6.28821 | 4.69596  | -0.31072 |
| C | -5.91073 | 2.048258 | -0.94395 |
| H | -6.93203 | 2.37188  | -1.12848 |
| C | -2.81734 | -3.02627 | -3.04824 |
| H | -2.27024 | -2.33324 | -3.68061 |

|   |          |          |          |
|---|----------|----------|----------|
| C | -4.15675 | -0.29053 | 4.871305 |
| H | -4.49276 | 0.208144 | 5.776349 |
| C | 0.217898 | 3.780881 | -3.13571 |
| H | -0.74167 | 3.485455 | -3.55388 |
| C | -4.31769 | 5.19226  | 0.332453 |
| H | -4.56021 | 6.229847 | 0.546063 |
| C | -5.52183 | 0.747978 | -1.20601 |
| H | -6.22269 | 0.019282 | -1.60056 |
| C | -0.66483 | 5.072965 | 1.197067 |
| H | 0.151982 | 5.697556 | 1.544238 |
| C | 2.212585 | 3.250675 | -1.85782 |
| H | 2.807913 | 2.551852 | -1.28139 |
| C | -1.93781 | 5.584481 | 1.027523 |
| H | -2.15176 | 6.627669 | 1.246072 |
| C | -4.90853 | -4.02026 | -2.32927 |
| H | -5.98788 | -4.1102  | -2.41909 |
| C | 3.946699 | -2.41917 | -3.42167 |
| H | 3.472241 | -2.30522 | -4.41922 |
| C | 1.887914 | -4.72904 | 2.748144 |
| H | 2.002262 | -4.39289 | 3.799889 |
| C | 7.087052 | 2.868402 | 1.461961 |
| H | 7.793537 | 3.692723 | 1.419316 |
| C | 2.715958 | 4.52517  | -2.13234 |
| H | 3.695608 | 4.804374 | -1.75325 |
| C | 1.968268 | 5.436847 | -2.88279 |
| H | 2.364453 | 6.426445 | -3.09228 |
| C | 7.247838 | 1.765299 | 0.61694  |
| H | 8.079948 | 1.729091 | -0.08098 |
| C | 6.025543 | 2.903095 | 2.369439 |
| H | 5.902085 | 3.7542   | 3.033957 |
| C | -4.21695 | -4.8034  | -1.39822 |
| H | -4.75664 | -5.50329 | -0.76558 |
| C | -4.20731 | -3.14031 | -3.15866 |
| H | -4.73843 | -2.54351 | -3.89612 |
| H | 2.237437 | 0.715021 | 1.419906 |

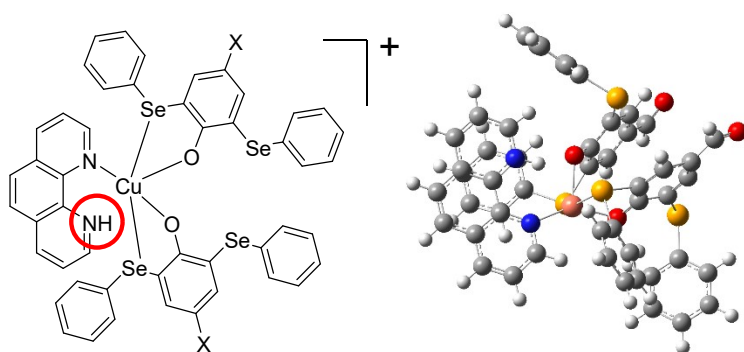

| Symbol | X       | Y        | Z       |
|--------|---------|----------|---------|
| Se     | 0.58538 | -0.92278 | 2.39849 |

|    |          |          |          |
|----|----------|----------|----------|
| Se | 4.116349 | 1.055005 | -1.89448 |
| Se | -0.43577 | -0.4009  | -2.52874 |
| Se | -0.43344 | 3.377612 | 1.847218 |
| Cu | -0.22775 | -1.23768 | -0.11652 |
| O  | -1.0587  | 0.744338 | 0.305239 |
| O  | 1.743911 | -0.72138 | -0.47601 |
| N  | -1.55841 | -2.83461 | 0.153461 |
| N  | -3.32856 | -0.57157 | 0.453819 |
| C  | 2.256555 | 0.128898 | 0.305536 |
| O  | 1.604448 | 5.735323 | -2.73453 |
| C  | 3.298798 | 1.053866 | -0.15385 |
| C  | -0.54109 | 1.641591 | -0.48281 |
| C  | -0.19652 | 2.946894 | -0.00349 |
| C  | -0.22967 | 1.379558 | -1.85142 |
| C  | -3.79838 | -1.84387 | 0.28908  |
| O  | 4.822055 | 4.022874 | 2.641431 |
| C  | 3.741019 | 1.873698 | 0.777265 |
| C  | 2.593839 | 1.10231  | 2.558409 |
| H  | 2.266173 | 1.184464 | 3.596228 |
| C  | -2.9153  | -2.9801  | 0.109751 |
| C  | 0.405939 | 3.884235 | -0.82954 |
| H  | 0.660302 | 4.867881 | -0.44447 |
| C  | 0.376299 | 2.325628 | -2.66826 |
| H  | 0.606241 | 2.076567 | -3.70233 |
| C  | 1.977538 | 0.205582 | 1.715789 |
| C  | -2.35273 | 3.601443 | 1.91003  |
| C  | 3.558694 | 2.073843 | 2.108505 |
| C  | 4.920954 | -0.70584 | -1.9399  |
| C  | -3.51744 | -4.26353 | -0.04924 |
| C  | 0.697882 | 3.596542 | -2.17661 |
| C  | 1.634058 | -2.46658 | 2.942256 |
| C  | -0.79815 | -3.93123 | 0.080353 |
| H  | 0.272803 | -3.7746  | 0.175217 |
| C  | 3.477261 | -4.00475 | 2.688017 |
| H  | 4.369201 | -4.32175 | 2.153846 |
| C  | 6.293296 | -0.81754 | -1.68383 |
| H  | 6.869832 | 0.061108 | -1.41106 |
| C  | 3.042268 | -4.71761 | 3.810463 |
| H  | 3.59664  | -5.58719 | 4.152217 |
| C  | -2.30408 | -0.43071 | -3.05292 |
| C  | -5.20565 | -2.03612 | 0.343294 |
| C  | -4.11288 | 0.481646 | 0.700155 |
| H  | -3.59773 | 1.429183 | 0.814845 |
| C  | -3.012   | 3.308888 | 3.111199 |
| H  | -2.45561 | 2.896619 | 3.949195 |
| C  | 1.202444 | -3.1644  | 4.075198 |
| H  | 0.337103 | -2.81947 | 4.636018 |
| C  | -4.13384 | -1.725   | -3.96875 |

|   |          |          |          |
|---|----------|----------|----------|
| H | -4.52577 | -2.67296 | -4.3288  |
| C | -3.07628 | 4.124637 | 0.831126 |
| H | -2.56356 | 4.380177 | -0.09126 |
| C | 2.7681   | -2.88763 | 2.239549 |
| H | 3.110476 | -2.34488 | 1.364366 |
| C | -4.94303 | -4.41335 | -0.04867 |
| H | -5.35778 | -5.40789 | -0.18739 |
| C | -2.67329 | -5.39021 | -0.17062 |
| H | -3.11507 | -6.37463 | -0.30032 |
| C | 4.16536  | -1.83218 | -2.29024 |
| H | 3.104889 | -1.73025 | -2.48947 |
| C | 1.900606 | -4.2989  | 4.499384 |
| H | 1.564914 | -4.83782 | 5.381396 |
| C | -2.81995 | -1.65392 | -3.50007 |
| H | -2.1978  | -2.54672 | -3.4995  |
| C | -5.75831 | -3.34362 | 0.151822 |
| H | -6.83771 | -3.46016 | 0.177858 |
| C | -1.30704 | -5.22781 | -0.09309 |
| H | -0.62571 | -6.0701  | -0.15304 |
| C | -5.49775 | 0.335213 | 0.797443 |
| H | -6.11093 | 1.202965 | 1.009937 |
| C | -3.09813 | 0.71868  | -3.08146 |
| H | -2.68788 | 1.670455 | -2.75811 |
| C | -6.03755 | -0.92054 | 0.599524 |
| H | -7.11289 | -1.07132 | 0.645953 |
| C | 6.162911 | -3.19538 | -2.11946 |
| H | 6.648109 | -4.16484 | -2.19561 |
| C | 1.308719 | 4.599745 | -3.06602 |
| H | 1.49353  | 4.249635 | -4.10512 |
| C | 4.03831  | 3.162562 | 2.984627 |
| H | 3.635267 | 3.120254 | 4.017145 |
| C | -5.11147 | 4.058388 | 2.15387  |
| H | -6.17502 | 4.258685 | 2.255583 |
| C | -4.41093 | 0.641023 | -3.55687 |
| H | -5.0196  | 1.541039 | -3.59527 |
| C | -4.93443 | -0.57807 | -3.99772 |
| H | -5.95026 | -0.63095 | -4.37956 |
| C | -4.45171 | 4.345159 | 0.952966 |
| H | -5.00167 | 4.768454 | 0.115715 |
| C | -4.38496 | 3.543888 | 3.233218 |
| H | -4.88427 | 3.328423 | 4.174689 |
| C | 6.911119 | -2.06757 | -1.76765 |
| H | 7.975353 | -2.15746 | -1.56788 |
| C | 4.794497 | -3.07608 | -2.38282 |
| H | 4.21739  | -3.95251 | -2.66669 |
| H | -2.31861 | -0.29603 | 0.328744 |

---

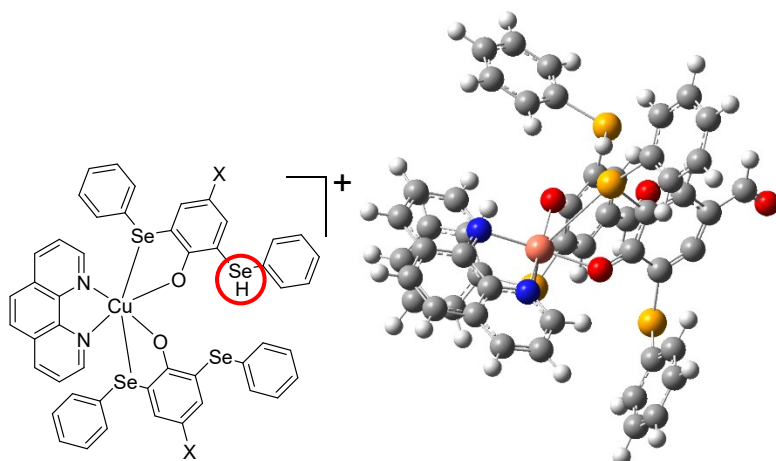

| Symbol | X         | Y         | Z         |
|--------|-----------|-----------|-----------|
| Se     | -1.585074 | -0.030743 | 2.305017  |
| Se     | -0.841623 | 3.143883  | -2.585312 |
| Se     | 1.913804  | 0.240212  | -2.109055 |
| Se     | -2.685762 | -2.62983  | -0.12787  |
| Cu     | 1.342419  | 0.100167  | 0.575018  |
| O      | 0.082029  | -1.34055  | -0.069074 |
| O      | -0.029602 | 1.597913  | 0.152713  |
| N      | 2.500108  | 1.502665  | 1.557877  |
| N      | 2.794678  | -1.175292 | 1.493484  |
| C      | -1.265357 | 1.503751  | -0.103541 |
| O      | -3.22489  | -1.800989 | -5.528665 |
| C      | -1.818141 | 2.141539  | -1.297484 |
| C      | -0.401267 | -1.285792 | -1.265819 |
| C      | -1.680006 | -1.856573 | -1.559784 |
| C      | 0.246046  | -0.667603 | -2.38002  |
| C      | 3.713078  | -0.461768 | 2.192264  |
| O      | -6.032731 | 1.668987  | -2.194546 |
| C      | -3.120014 | 2.000192  | -1.528806 |
| C      | -3.599279 | 0.875776  | 0.427821  |
| H      | -4.309867 | 0.374349  | 1.085515  |
| C      | 3.555204  | 0.971477  | 2.226687  |
| C      | -2.257423 | -1.854074 | -2.816724 |
| H      | -3.235052 | -2.292465 | -3.002968 |
| C      | -0.330004 | -0.66529  | -3.64276  |
| H      | 0.200244  | -0.189607 | -4.465116 |
| C      | -2.254762 | 0.885752  | 0.744615  |
| C      | -1.718636 | -4.232883 | 0.380264  |
| C      | -4.121721 | 1.43594   | -0.784469 |
| C      | -0.134339 | 4.603926  | -1.530558 |
| C      | 4.481554  | 1.765189  | 2.945262  |
| C      | -1.576057 | -1.263669 | -3.891518 |
| C      | -3.050701 | 0.280198  | 3.53296   |
| C      | 2.322107  | 2.818928  | 1.569957  |
| H      | 1.460156  | 3.187875  | 1.022069  |
| C      | -4.151064 | 1.730384  | 5.119878  |
| H      | -4.212595 | 2.682008  | 5.640712  |

|   |           |           |           |
|---|-----------|-----------|-----------|
| C | -0.753006 | 5.04198   | -0.35678  |
| H | -1.645169 | 4.543327  | 0.008827  |
| C | -5.095062 | 0.729693  | 5.374233  |
| H | -5.890255 | 0.90464   | 6.093467  |
| C | 3.143752  | -1.202752 | -2.537142 |
| C | 4.799118  | -1.064994 | 2.873012  |
| C | 2.91611   | -2.495672 | 1.439541  |
| H | 2.160691  | -3.02113  | 0.862504  |
| C | -0.719772 | -4.19266  | 1.354441  |
| H | -0.426977 | -3.250302 | 1.803726  |
| C | -3.992358 | -0.72272  | 3.781378  |
| H | -3.929972 | -1.673893 | 3.260449  |
| C | 5.326312  | -1.835813 | -3.367756 |
| H | 6.299601  | -1.550908 | -3.758629 |
| C | -2.103512 | -5.428304 | -0.230602 |
| H | -2.889594 | -5.445638 | -0.98084  |
| C | -3.123025 | 1.506186  | 4.201932  |
| H | -2.386388 | 2.2783    | 4.000415  |
| C | 5.572643  | 1.123083  | 3.625801  |
| H | 6.279486  | 1.74125   | 4.172912  |
| C | 4.268743  | 3.163717  | 2.945614  |
| H | 4.954495  | 3.812093  | 3.485261  |
| C | 0.987323  | 5.272375  | -2.034533 |
| H | 1.46597   | 4.937457  | -2.951366 |
| C | -5.015283 | -0.495891 | 4.707684  |
| H | -5.748369 | -1.273279 | 4.905036  |
| C | 4.399615  | -0.843502 | -3.036578 |
| H | 4.652884  | 0.203528  | -3.185406 |
| C | 5.725102  | -0.233123 | 3.591166  |
| H | 6.555158  | -0.70611  | 4.109211  |
| C | 3.190206  | 3.688769  | 2.258433  |
| H | 3.000813  | 4.756969  | 2.235356  |
| C | 3.958615  | -3.189237 | 2.085751  |
| H | 4.015603  | -4.270341 | 2.006833  |
| C | 2.811184  | -2.550315 | -2.373179 |
| H | 1.833787  | -2.832006 | -1.99457  |
| C | 4.901889  | -2.473578 | 2.799744  |
| H | 5.720152  | -2.980672 | 3.304828  |
| C | 0.896113  | 6.809792  | -0.161068 |
| H | 1.289455  | 7.675295  | 0.365072  |
| C | -2.165807 | -1.268519 | -5.244677 |
| H | -1.568753 | -0.7457   | -6.020922 |
| C | -5.530711 | 1.237634  | -1.175518 |
| H | -6.133704 | 0.667707  | -0.435976 |
| C | -0.462862 | -6.592355 | 1.115462  |
| H | 0.02608   | -7.517312 | 1.407909  |
| C | 3.731749  | -3.537401 | -2.735923 |
| H | 3.461162  | -4.585334 | -2.631222 |
| C | 4.993933  | -3.185737 | -3.223508 |
| H | 5.70671   | -3.956824 | -3.502154 |



|   |           |           |           |
|---|-----------|-----------|-----------|
| C | -1.458133 | -6.612515 | 0.134143  |
| H | -1.744951 | -7.547885 | -0.337458 |
| C | -0.098452 | -5.387773 | 1.725508  |
| H | 0.66938   | -5.376969 | 2.494435  |
| C | -0.231297 | 6.141854  | 0.328319  |
| H | -0.720539 | 6.488202  | 1.235264  |
| C | 1.500185  | 6.373767  | -1.344426 |
| H | 2.369893  | 6.893524  | -1.737741 |
| H | -2.152566 | -1.737562 | 1.019378  |

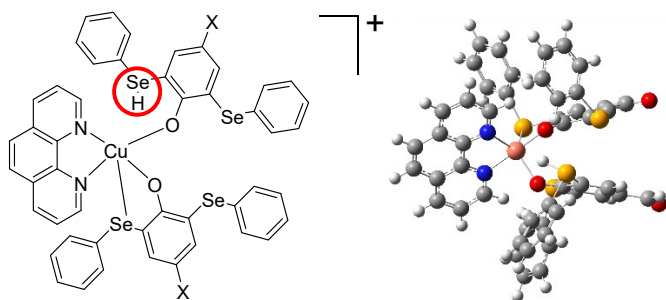

| Symbol | X        | Y        | Z        |
|--------|----------|----------|----------|
| Se     | 0.720441 | 1.17974  | -2.4267  |
| Se     | 1.739369 | -3.52032 | 0.783035 |
| Se     | -0.38283 | -1.8613  | 2.703722 |
| Se     | -2.51105 | 0.014268 | -2.25161 |
| Cu     | 0.250991 | 1.160588 | 0.021473 |
| O      | -1.37622 | 0.157199 | 0.680752 |
| O      | 1.236297 | -0.5027  | 0.066508 |
| N      | 1.665374 | 2.218696 | 1.158398 |
| N      | -0.72134 | 2.906829 | 0.181533 |
| C      | 1.195382 | -1.23879 | -0.99    |
| O      | -3.62654 | -5.34245 | -1.68392 |
| C      | 1.398875 | -2.67478 | -0.90137 |
| C      | -1.71773 | -1.03665 | 0.32697  |
| C      | -2.36665 | -1.34661 | -0.91413 |
| C      | -1.46953 | -2.16806 | 1.165297 |
| C      | -0.03013 | 3.864788 | 0.847077 |
| O      | 0.96915  | -4.96783 | -4.54649 |
| C      | 1.326001 | -3.34926 | -2.05612 |
| C      | 1.026149 | -1.49403 | -3.43623 |
| H      | 0.851162 | -1.03838 | -4.41138 |
| C      | 1.266393 | 3.502349 | 1.350936 |
| C      | -2.7764  | -2.63566 | -1.21098 |
| H      | -3.27488 | -2.8467  | -2.15219 |
| C      | -1.86739 | -3.46311 | 0.86632  |
| H      | -1.63993 | -4.28638 | 1.540653 |
| C      | 1.047887 | -0.70359 | -2.30291 |
| C      | -4.24192 | 0.787204 | -1.87164 |
| C      | 1.131984 | -2.90837 | -3.34421 |

|   |          |          |          |
|---|----------|----------|----------|
| C | 3.392616 | -2.65408 | 1.276505 |
| C | 2.055699 | 4.467005 | 2.017448 |
| C | -2.55141 | -3.70868 | -0.3268  |
| C | 2.528637 | 1.837824 | -2.68169 |
| C | 2.869296 | 1.856113 | 1.585717 |
| H | 3.14957  | 0.822662 | 1.405975 |
| C | 4.904191 | 1.790901 | -2.27147 |
| H | 5.767042 | 1.332153 | -1.79643 |
| C | 4.532691 | -2.84165 | 0.488594 |
| H | 4.469663 | -3.43391 | -0.41905 |
| C | 5.07145  | 2.906888 | -3.09523 |
| H | 6.063134 | 3.317317 | -3.26143 |
| C | -1.59969 | -1.04471 | 3.992756 |
| C | -0.53748 | 5.166961 | 1.055648 |
| C | -1.93813 | 3.178922 | -0.27709 |
| H | -2.41978 | 2.368332 | -0.81219 |
| C | -4.65555 | 1.826794 | -2.71478 |
| H | -4.02082 | 2.150633 | -3.53645 |
| C | 2.689228 | 2.951611 | -3.5114  |
| H | 1.83055  | 3.390534 | -4.01229 |
| C | -2.48178 | -1.11843 | 6.233196 |
| H | -2.5119  | -1.57438 | 7.218094 |
| C | -5.06691 | 0.363206 | -0.82808 |
| H | -4.75732 | -0.44563 | -0.17473 |
| C | 3.634278 | 1.255847 | -2.05442 |
| H | 3.513594 | 0.391012 | -1.41009 |
| C | 1.525973 | 5.79028  | 2.199949 |
| H | 2.136987 | 6.526526 | 2.714298 |
| C | 3.329074 | 4.049955 | 2.468546 |
| H | 3.975855 | 4.755044 | 2.983641 |
| C | 3.471637 | -1.91875 | 2.46279  |
| H | 2.585972 | -1.77125 | 3.073565 |
| C | 3.962316 | 3.488663 | -3.71066 |
| H | 4.085745 | 4.350346 | -4.36037 |
| C | -1.62886 | -1.63783 | 5.256875 |
| H | -0.99807 | -2.4926  | 5.48618  |
| C | 0.2821   | 6.123254 | 1.747144 |
| H | -0.10711 | 7.125739 | 1.900366 |
| C | 3.735568 | 2.747525 | 2.247057 |
| H | 4.707667 | 2.398161 | 2.578355 |
| C | -2.53353 | 4.441361 | -0.10153 |
| H | -3.52926 | 4.61517  | -0.49498 |
| C | -2.40729 | 0.051261 | 3.679909 |
| H | -2.37933 | 0.491414 | 2.688823 |
| C | -1.83323 | 5.435997 | 0.556517 |
| H | -2.26765 | 6.422525 | 0.694133 |
| C | 5.831399 | -1.54712 | 2.068955 |
| H | 6.783419 | -1.12855 | 2.38287  |

|   |          |          |          |
|---|----------|----------|----------|
| C | -3.01244 | -5.07001 | -0.67204 |
| H | -2.75713 | -5.85346 | 0.074764 |
| C | 0.920452 | -3.75764 | -4.54144 |
| H | 0.718853 | -3.17859 | -5.46912 |
| C | -6.72042 | 2.020192 | -1.46602 |
| H | -7.68599 | 2.492491 | -1.31138 |
| C | -3.25225 | 0.559573 | 4.666492 |
| H | -3.88721 | 1.411237 | 4.44004  |
| C | -3.29093 | -0.02144 | 5.937262 |
| H | -3.95505 | 0.380183 | 6.696913 |
| C | -6.30318 | 0.982497 | -0.63123 |
| H | -6.94532 | 0.643596 | 0.17734  |
| C | -5.89165 | 2.439971 | -2.50917 |
| H | -6.20987 | 3.23816  | -3.17433 |
| C | 5.746005 | -2.2742  | 0.878285 |
| H | 6.629797 | -2.42111 | 0.263883 |
| C | 4.695933 | -1.37694 | 2.863506 |
| H | 4.759904 | -0.82576 | 3.798147 |
| H | 0.186838 | -0.61662 | 2.139128 |

## Intermediate II

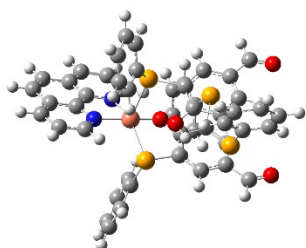

| Symbol | X        | Y        | Z        |
|--------|----------|----------|----------|
| Se     | 0.481847 | -0.47755 | 2.356192 |
| Se     | -0.07593 | 3.341706 | -1.84912 |
| Se     | 0.246302 | -1.50289 | -1.70565 |
| Se     | -4.3401  | 0.165353 | 1.358312 |
| Cu     | 1.68989  | -0.69134 | 0.254249 |
| O      | -1.8688  | -1.45532 | 0.589135 |
| O      | 1.163473 | 1.082093 | -0.11625 |
| N      | 3.378447 | -0.29463 | -0.84424 |
| N      | 2.701453 | -2.4028  | 0.632141 |
| C      | 0.144842 | 1.628349 | 0.489572 |
| O      | -4.13496 | 2.919604 | -3.50057 |
| C      | -0.52437 | 2.75608  | -0.07893 |
| C      | -2.21498 | -0.60653 | -0.40908 |
| C      | -3.34791 | 0.228648 | -0.29467 |
| C      | -1.41311 | -0.53452 | -1.55907 |
| C      | 3.904299 | -2.4493  | -0.00655 |
| O      | -3.93195 | 4.331111 | 2.030056 |
| C      | -1.57388 | 3.276665 | 0.613755 |

|   |          |          |          |
|---|----------|----------|----------|
| C | -1.44134 | 1.702868 | 2.37353  |
| H | -1.80156 | 1.278012 | 3.308879 |
| C | 4.265799 | -1.316   | -0.80836 |
| C | -3.6604  | 1.120593 | -1.3088  |
| H | -4.51007 | 1.789379 | -1.21648 |
| C | -1.74646 | 0.35704  | -2.57576 |
| H | -1.11423 | 0.423896 | -3.45682 |
| C | -0.35139 | 1.13705  | 1.723571 |
| C | -5.83191 | -0.91725 | 0.755547 |
| C | -2.09663 | 2.821244 | 1.822008 |
| C | 1.595931 | 4.255272 | -1.54127 |
| C | 5.492222 | -1.29568 | -1.50631 |
| C | -2.86645 | 1.188425 | -2.46307 |
| C | 1.851864 | 0.271599 | 3.513346 |
| C | 3.644351 | 0.778662 | -1.5814  |
| H | 2.88137  | 1.551381 | -1.59097 |
| C | 3.727176 | 1.734595 | 3.897587 |
| H | 4.429822 | 2.479068 | 3.53429  |
| C | 1.899581 | 4.891739 | -0.33449 |
| H | 1.190769 | 4.872291 | 0.487302 |
| C | 3.796    | 1.29478  | 5.222498 |
| H | 4.553136 | 1.696828 | 5.889222 |
| C | -0.34427 | -3.34503 | -1.78044 |
| C | 4.778536 | -3.55682 | 0.078535 |
| C | 2.335519 | -3.44518 | 1.373858 |
| H | 1.373481 | -3.37339 | 1.870577 |
| C | -5.72579 | -2.3087  | 0.681022 |
| H | -4.79944 | -2.80488 | 0.954645 |
| C | 1.908497 | -0.16794 | 4.837147 |
| H | 1.191802 | -0.89635 | 5.205652 |
| C | -0.87841 | -5.26613 | -3.14508 |
| H | -0.99248 | -5.71915 | -4.12557 |
| C | -7.02375 | -0.27649 | 0.407429 |
| H | -7.09933 | 0.804667 | 0.471126 |
| C | 2.757919 | 1.223904 | 3.034639 |
| H | 2.701956 | 1.571422 | 2.007311 |
| C | 6.365175 | -2.431   | -1.3972  |
| H | 7.309458 | -2.41488 | -1.93358 |
| C | 5.767623 | -0.13767 | -2.27137 |
| H | 6.700124 | -0.06794 | -2.82474 |
| C | 2.507363 | 4.308263 | -2.60396 |
| H | 2.270806 | 3.822515 | -3.54779 |
| C | 2.888818 | 0.344207 | 5.690874 |
| H | 2.932677 | 0.006479 | 6.722189 |
| C | -0.48882 | -3.92987 | -3.04183 |
| H | -0.29473 | -3.34794 | -3.93762 |
| C | 6.023249 | -3.51268 | -0.638   |
| H | 6.691834 | -4.36528 | -0.56499 |

|   |          |          |          |
|---|----------|----------|----------|
| C | 4.845832 | 0.892029 | -2.30812 |
| H | 5.029055 | 1.79265  | -2.88365 |
| C | 3.139163 | -4.5878  | 1.520586 |
| H | 2.791731 | -5.40758 | 2.139642 |
| C | -0.59129 | -4.08755 | -0.62297 |
| H | -0.5023  | -3.62053 | 0.350069 |
| C | 4.360481 | -4.6457  | 0.875418 |
| H | 4.999558 | -5.5187  | 0.974384 |
| C | 4.023015 | 5.623692 | -1.24927 |
| H | 4.959637 | 6.161898 | -1.1364  |
| C | -3.18269 | 2.168402 | -3.52966 |
| H | -2.46957 | 2.173795 | -4.38268 |
| C | -3.28978 | 3.402941 | 2.473201 |
| H | -3.57046 | 2.908753 | 3.430148 |
| C | -8.01465 | -2.4254  | -0.09436 |
| H | -8.86639 | -3.01395 | -0.42294 |
| C | -0.97949 | -5.42345 | -0.73392 |
| H | -1.18019 | -6.00353 | 0.162765 |
| C | -1.1236  | -6.01298 | -1.99169 |
| H | -1.42847 | -7.05233 | -2.07285 |
| C | -8.11688 | -1.03577 | -0.01472 |
| H | -9.0446  | -0.53873 | -0.28292 |
| C | -6.82018 | -3.06072 | 0.253127 |
| H | -6.74066 | -4.14262 | 0.193918 |
| C | 3.114749 | 5.563067 | -0.19011 |
| H | 3.342259 | 6.057959 | 0.750336 |
| C | 3.711528 | 5.000867 | -2.45942 |
| H | 4.40234  | 5.056528 | -3.297   |
| H | -2.54428 | -1.32319 | 1.30159  |

### Intermediate III

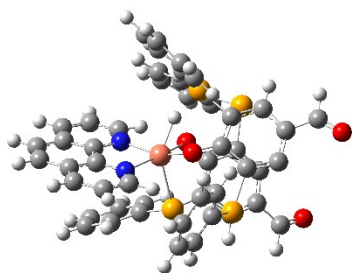

| Symbol | X        | Y        | Z        |
|--------|----------|----------|----------|
| Se     | 0.923239 | -0.18446 | 2.644825 |
| Se     | -0.32112 | -3.15926 | -1.91991 |
| Se     | -0.5018  | 0.196117 | -2.41813 |
| Se     | 4.023781 | 0.307861 | 1.073397 |
| Cu     | -1.01567 | 0.377107 | 0.077702 |
| O      | 1.253937 | 0.980602 | -0.01116 |
| O      | -0.91229 | -1.44989 | 0.533479 |

|   |          |          |          |
|---|----------|----------|----------|
| N | -3.24972 | 0.322975 | -0.06462 |
| N | -1.4595  | 2.26721  | 0.428264 |
| C | 0.207825 | -2.10182 | 0.678138 |
| O | 5.522915 | -1.74801 | -3.91516 |
| C | 0.609041 | -3.17973 | -0.16823 |
| C | 1.935242 | 0.366498 | -0.8954  |
| C | 3.321284 | 0.026348 | -0.68495 |
| C | 1.382262 | -0.03597 | -2.16053 |
| C | -2.77991 | 2.611623 | 0.390769 |
| O | 3.895959 | -5.71632 | 1.139655 |
| C | 1.646125 | -4.06183 | 0.0294   |
| C | 2.253973 | -2.6246  | 1.965933 |
| H | 2.957093 | -2.35465 | 2.755831 |
| C | -3.73995 | 1.559092 | 0.183218 |
| C | 4.07801  | -0.58315 | -1.66192 |
| H | 5.122783 | -0.82089 | -1.48598 |
| C | 2.148267 | -0.66832 | -3.12419 |
| H | 1.687954 | -0.96952 | -4.06293 |
| C | 1.138118 | -1.81787 | 1.724569 |
| C | 3.995187 | 2.243026 | 1.123134 |
| C | 2.450314 | -3.77027 | 1.184626 |
| C | -2.12196 | -3.66994 | -1.54259 |
| C | -5.12935 | 1.843063 | 0.229897 |
| C | 3.510863 | -0.93333 | -2.90811 |
| C | -0.48811 | -0.55998 | 3.942182 |
| C | -4.09832 | -0.68473 | -0.21573 |
| H | -3.6548  | -1.65948 | -0.39226 |
| C | -2.1096  | -2.0108  | 4.975674 |
| H | -2.5926  | -2.98231 | 5.043118 |
| C | -2.4976  | -4.27406 | -0.33257 |
| H | -1.74244 | -4.44156 | 0.428955 |
| C | -2.49864 | -0.97569 | 5.829028 |
| H | -3.28081 | -1.14073 | 6.565811 |
| C | -0.56812 | 2.068741 | -2.92564 |
| C | -3.23094 | 3.944638 | 0.560594 |
| C | -0.55684 | 3.249864 | 0.526747 |
| H | 0.479152 | 2.931044 | 0.481155 |
| C | 3.067832 | 2.919326 | 1.922138 |
| H | 2.306386 | 2.351085 | 2.444845 |
| C | -0.87461 | 0.481629 | 4.788659 |
| H | -0.38882 | 1.452995 | 4.72067  |
| C | -1.97208 | 3.945497 | -3.55862 |
| H | -2.96262 | 4.348835 | -3.75772 |
| C | 4.943973 | 2.9724   | 0.400467 |
| H | 5.660305 | 2.441263 | -0.21948 |
| C | -1.10518 | -1.80641 | 4.028138 |
| H | -0.80471 | -2.60419 | 3.356331 |
| C | -5.55414 | 3.197458 | 0.438266 |

|   |          |          |          |
|---|----------|----------|----------|
| H | -6.62039 | 3.410012 | 0.467448 |
| C | -6.01081 | 0.75496  | 0.050358 |
| H | -7.08493 | 0.925253 | 0.078382 |
| C | -3.10736 | -3.47505 | -2.52632 |
| H | -2.83381 | -3.00842 | -3.46987 |
| C | -1.87992 | 0.272442 | 5.734164 |
| H | -2.1776  | 1.083497 | 6.394391 |
| C | -1.83533 | 2.608437 | -3.18705 |
| H | -2.72047 | 1.983155 | -3.08846 |
| C | -4.64421 | 4.203615 | 0.581162 |
| H | -4.97608 | 5.22958  | 0.7222   |
| C | -5.49586 | -0.51183 | -0.15964 |
| H | -6.14176 | -1.37211 | -0.3021  |
| C | -0.91573 | 4.597804 | 0.668296 |
| H | -0.13209 | 5.343855 | 0.753667 |
| C | 0.558805 | 2.888434 | -3.03682 |
| H | 1.543598 | 2.484526 | -2.82599 |
| C | -2.25383 | 4.950661 | 0.706095 |
| H | -2.5603  | 5.985802 | 0.835825 |
| C | -4.79843 | -4.45153 | -1.0905  |
| H | -5.82729 | -4.7583  | -0.91597 |
| C | 4.316322 | -1.54442 | -3.95817 |
| H | 3.734961 | -1.82355 | -4.86906 |
| C | 3.562646 | -4.64031 | 1.606649 |
| H | 4.136343 | -4.22577 | 2.4806   |
| C | 4.052962 | 5.039557 | 1.287432 |
| H | 4.078668 | 6.124646 | 1.35589  |
| C | 0.416889 | 4.225731 | -3.41269 |
| H | 1.302288 | 4.852029 | -3.49741 |
| C | -0.84467 | 4.762047 | -3.67704 |
| H | -0.94939 | 5.803707 | -3.9705  |
| C | 4.968928 | 4.36617  | 0.475899 |
| H | 5.709182 | 4.924895 | -0.09219 |
| C | 3.104488 | 4.312827 | 2.010971 |
| H | 2.383614 | 4.830866 | 2.640127 |
| C | -3.82131 | -4.6506  | -0.10879 |
| H | -4.09091 | -5.11401 | 0.838377 |
| C | -4.42847 | -3.86545 | -2.3046  |
| H | -5.17187 | -3.70667 | -3.0838  |
| H | -0.12179 | 0.342489 | 1.55516  |

---

## Electrochemical Studies

### Overpotential Calculation

Calculations of  $E_{1/2}^T (= E_{\text{ref}})$  and  $\eta$  using  $E_{\text{H}^+/\text{H}_2}^0$ ,  $pK_a$ ,  $\epsilon_D$  and  $C_{\text{H}_2}^0$  using Fourmond's approach.

+3 Values for  $E_{\text{H}^+/\text{H}_2}^0$ ,  $pK_a$ ,  $\epsilon_D$  and  $C_{\text{H}_2}^0$  were obtained from the same reference.

$$E_{1/2}^T = E_{\frac{\text{H}^+}{\text{H}_2}}^0 - 2.303 \frac{RT}{F} pK_a + \epsilon_D - \frac{RT}{2F} \ln \frac{C_0}{C_{\text{H}_2}^0} \quad (1)$$

**2a** with 14mM acetic acid in DMF

$$E_{1/2}^T = (-0.62) - 2.303 \times \frac{8.314 \times 298}{96485} \times 13.5 + 0.040 - \frac{8.314 \times 298}{2 \times 96485} \ln \frac{26\text{mM}}{1.9\text{mM}}$$

$$E_{\frac{1}{2}}^T = -1.41 \text{ V vs } Fc^+ / Fc$$

$$\text{Overpotential } (\eta) = E_{\text{ref}} - E_{\text{cat}/2} = -1.41 - (-2.01) = \mathbf{0.60 \text{ V vs } Fc^+ / Fc}$$

**2b** with 22mM acetic acid in DMF

$$E_{1/2}^T = (-0.62) - 2.303 \times \frac{8.314 \times 298}{96485} \times 13.5 + 0.040 - \frac{8.314 \times 298}{2 \times 96485} \ln \frac{22\text{mM}}{1.9\text{mM}}$$

$$E_{1/2}^T = -1.41 \text{ V vs } Fc^+ / Fc$$

$$\text{Overpotential } (\eta) = E_{\text{ref}} - E_{\text{cat}/2} = -1.41 - (-2.09) = \mathbf{0.68 \text{ V vs } Fc^+ / Fc}$$

**2c** with 44mM acetic acid in DMF

$$E_{1/2}^T = (-0.62) - 2.303 \times \frac{8.314 \times 298}{96485} \times 13.5 + 0.040 - \frac{8.314 \times 298}{2 \times 96485} \ln \frac{44\text{mM}}{1.9\text{mM}}$$

$$E_{1/2}^T = -1.42 \text{ V vs } Fc^+ / Fc$$

$$\text{Overpotential } (\eta) = E_{\text{ref}} - E_{\text{cat}/2} = -1.42 - (-2.03) = \mathbf{0.61 \text{ V vs } Fc^+ / Fc}$$

**2d** with 20mM acetic acid in DMF

$$E_{1/2}^T = (-0.62) - 2.303 \times \frac{8.314 \times 298}{96485} \times 13.5 + 0.040 - \frac{8.314 \times 298}{2 \times 96485} \ln \frac{28\text{mM}}{1.9\text{mM}}$$

$$E_{1/2}^T = -1.41 \text{ V vs } Fc^+ / Fc$$

$$\text{Overpotential } (\eta) = E_{\text{ref}} - E_{\text{cat}/2} = -1.41 - (-2.12) = \mathbf{0.71 \text{ V vs } Fc^+ / Fc}$$



**Turn over frequency (TOF) calculation:****Table S5.** Experimental results from acetic acid titration under cathodic direction

| <i>Catalyst</i> | <i>i<sub>cat</sub></i> $\mu A$ | <i>i<sub>p</sub></i> $\mu A$ | <i>i<sub>cat</sub>/i<sub>p</sub></i> | <i>Scan rate</i><br>(V/s) | <i>TOF</i> ( $s^{-1}$ ) |
|-----------------|--------------------------------|------------------------------|--------------------------------------|---------------------------|-------------------------|
| <b>2a</b>       | 695                            | 35                           | 19.8                                 | 0.5                       | 382                     |
| <b>2b</b>       | 528                            | 25                           | 21                                   | 0.5                       | 427                     |
| <b>2c</b>       | 1043                           | 30                           | 35                                   | 0.5                       | 1188                    |
| <b>2d</b>       | 651                            | 27                           | 24                                   | 0.5                       | 564                     |

**Calculation of Faradaic Efficiency (F.E.):****Table S6.** Experimental results from controlled-potential coulometry experiment

| <i>Catalyst</i> | <i>Coulombs</i><br>(C)* | <i>Exp. moles of H<sub>2</sub></i><br>( $\times 10^{-3}$ moles)* | <i>% Faradaic</i><br><i>Efficiency</i> |
|-----------------|-------------------------|------------------------------------------------------------------|----------------------------------------|
| <b>2a</b>       | 9.1                     | 0.040                                                            | 84                                     |
| <b>2b</b>       | 2.2                     | 0.0053                                                           | 47                                     |
| <b>2c</b>       | 12.1                    | 0.056                                                            | 89                                     |
| <b>2d</b>       | 3.5                     | 0.091                                                            | 50                                     |

\* Values are obtained after subtracting the background charge and moles.

## References

1. A. Upadhyay, B. Singh Bhakuni, R. Meena and S. Kumar, *Chem. Asian J.*, 2021, **16**, 966-973.
2. S. Alvarez, P. Alemany, D. Casanova, J. Cirera, M. Llunell and D. Avnir, *Coord. Chem. Rev.*, 2005, **249**, 1693-1708.
3. (a) J. M. Saveant and E. Vianello, *Electrochimica Acta*, 1965, **10**, 905-920; (b) A. D. Wilson, R. H. Newell, M. J. McNevin, J. T. Muckerman, M. Rakowski DuBois and D. L. DuBois, *J. Am. Chem. Soc.*, 2006, **128**, 358-366.
4. A. M. Appel, D. L. DuBois and M. Rakowski DuBois, *J. Am. Chem. Soc.*, 2005, **127**, 12717-12726.
